# Supplementary material
Source: publisher site journal article supplement (https://www.dovepress.com/article/316701)
Supplement: Supplementary file 1 [file get_supplementary_file.php]

**Supplementary table 1. Peak informations of the TIC chromatography.**

| **Peak No.** | **Average Rt (min)** | **Average m/z** | **Adduct type** | **MS/MS spectrum** | **Error (ppm)** | **Formula** | **Compound** | **Category** |
| --- | --- | --- | --- | --- | --- | --- | --- | --- |
| 1 | 1.295 | 334.11398 | [M+NH4]+ | 100.03965 142.08577 | -2.3488 | C13H16O9 | 3,4,5-trihydroxy-6-(2-hydroxy-3-methoxyphenoxy)oxane-2-carboxylic acid | Organooxygen compounds |
| 2 | 1.49 | 421.2103 | [M+H]+ | 134.06029 150.06197 | 4.4831 | C25H28N2O4 | 1-[(1S,2aS,8bS)-1-(hydroxymethyl)-4-[4-oxanyl(oxo)methyl]-1,2a,3,8b-tetrahydroazeto[2,3-c]quinolin-2-yl]-2-phenylethanone | Quinolines and derivatives |
| 3 | 1.933 | 303.11301 | [M+H]+ | 103.05386 150.05606 | -0.6484 | C19H14N2O2 | xanthocillin X monomethyl ether | Lignans, neolignans and related compounds |
| 4 | 2.193 | 268.10443 | [M+H]+ | 119.03503 137.06378 | -1.3841 | C10H13N5O4 | adenosine | Nucleosides, nucleotides, and analogues |
| 5 | 2.378 | 190.05052 | [M+H]+ | 125.08247 167.10365 | -3.3352 | C10H7NO3 | 4(1H)-quinolone-3-carboxylic acid | Quinolines and derivatives |
| 6 | 3.113 | 235.07228 | [M+H]+ | 121.05088 221.08284 | -4.1301 | C11H10N2O | deoxyvasicinone | Quinolines and derivatives |
| 7 | 3.764 | 365.12146 | [M+Na]+ | 103.05421 121.05092 | 0.843 | C16H22O8 | cis-coniferin | Organooxygen compounds |
| 8 | 3.995 | 206.09201 | [M+NH4]+ | 173.07097 146.06024 | -4.4991 | C10H8N2O2 | (1H-Indol-3-yl)oxoacetamide | Organoheterocyclic compounds |
| 9 | 4.039 | 357.10727 | [M+Na]+ | 146.02394 173.07095 | -4.7678 | C16H18N2O6 | cappariloside A | Indoles and derivatives |
| 10 | 4.298 | 322.09027 | [M+H]+ | 134.06023 162.05605 | 5.6941 | C15H15NO7 | indiforine A | Organic acids and derivatives |
| 11 | 4.447 | 704.30981 | [M+NH4]+ | 106.06523 295.13013 | -0.8654 | C32H46O16 | secoisolariciresinol diglucoside | Lignans, neolignans and related compounds |
| 12 | 4.673 | 404.15549 | [M+NH4]+ | 131.05182 147.04999 | -0.2007 | C17H22O10 | cis-syringin | Organooxygen compounds |
| 13 | 5.06 | 647.15845 | [M+Na]+ | 102.03434 343.08124 | -0.2313 | C28H32O16 | isoscoparin-3''-O-glucoside | Phenylpropanoids and polyketides |
| 14 | 5.074 | 165.06564 | [M+NH4]+ | 102.03434 120.04424 | -1.3269 | C8H5NO2 | isatin | Indoles and derivatives |
| 15 | 5.479 | 801.22388 | [M+H]+ | 137.05952 547.21387 | 1.7493 | C38H40O19 | isoscoparin-3''-O-feruloylglucoside | Phenylpropanoids and polyketides |
| 16 | 5.567 | 595.16486 | [M+H]+ | 379.08118 415.10254 | 1.425 | C27H30O15 | isovitexin-3''-O-glucoside | Phenylpropanoids and polyketides |
| 17 | 5.602 | 433.11276 | [M+H]+ | 379.08102 397.09238 | 0.2853 | C21H20O10 | isovitexin | Phenylpropanoids and polyketides |
| 18 | 5.611 | 869.18713 | [M+K]+ | 369.11783 689.21625 | 1.7639 | C39H42O20 | isoscoparin-3''-O-sinapoylglucoside | Phenylpropanoids and polyketides |
| 19 | 5.814 | 538.22797 | [M+NH4]+ | 175.07556 311.12772 | 0.1586 | C26H32O11 | matairesinol-4-O-D-glucopyranoside | Lignans, neolignans and related compounds |
| 20 | 5.945 | 575.20996 | [M+Na]+ | 219.10175 413.15833 | 3.2634 | C27H36O12 | conicaoside | Lignans, neolignans and related compounds |
| 21 | 6.624 | 511.17053 | [M+H]+ | 207.06573 301.07166 | 0.6978 | C26H26N2O9 | naucleofficine B | Organooxygen compounds |
| 22 | 6.885 | 385.161 | [M+Na]+ | 121.05143 137.05986 | -4.6342 | C20H26O6 | secoisolariciresinol | Lignans, neolignans and related compounds |
| 23 | 6.957 | 206.08131 | [M+H]+ | 147.04585 175.03899 | -1.6106 | C11H11NO3 | 1-methoxy-3-indoleacetic acid | Indoles and derivatives |
| 24 | 6.997 | 334.11862 | [M+H]+ | 120.04435 248.08998 | 0.0534 | C19H15N3O3 | UNPD118118 | Indoles and derivatives |
| 25 | 7.19 | 425.13483 | [M+H]+ | 208.06868 351.10675 | -1.1143 | C22H20N2O7 | adifoline | Alkaloids and derivatives |
| 26 | 7.504 | 407.12384 | [M+H]+ | 117.05778 132.07645 | -0.0918 | C22H18N2O6 | isatisindigoticanine A | Indoles and derivatives |
| 27 | 7.65 | 371.12411 | [M+K]+ | 106.0654 260.09628 | -0.9113 | C19H18N2O6 | DOB 41 | Diazanaphthalenes |
| 28 | 7.827 | 797.51526 | [M+H]+ | 130.06592 493.21921 | -4.6674 | C47H73O8P | 1,2-diacylglycerol-3-phosphates | Lipids and lipid-like molecules |
| 29 | 8.035 | 395.11572 | [M+H]+ | 149.02405 207.09874 | 3.9022 | C20H18N4O3S | 5-[4-[(2-methyl-4-thiazolyl)methylamino]-6-quinazolinyl]-2-furancarboxylic acid ethyl ester | Diazanaphthalenes |
| 30 | 8.271 | 495.12073 | [M+K]+ | 170.06058 479.14111 | -0.5555 | C28H24O6 | UNPD21824 | Coumarins and derivatives |
| 31 | 8.373 | 309.20541 | [M+H]+ | 121.09688 146.05927 | 2.063 | C18H28O4 | corchorifatty acid B | Lipids and lipid-like molecules |
| 32 | 8.717 | 209.15335 | [M+H]+ | 129.05745 176.07153 | 0.9911 | C13H20O2 | 5-megastigmen-7-yne-3,9-diol | Organooxygen compounds |
| 33 | 9.118 | 346.15561 | [M+H]+ | 201.10277 281.05176 | -1.7288 | C21H19N3O2 | UNPD181392 | Alkaloids and derivatives |
| 34 | 9.37 | 232.06076 | [M+H]+ | 149.02438 178.05095 | -1.5832 | C12H9NO4 | 3-(carboxymethyl)-2-quinolinecarboxylic acid | Quinolines and derivatives |
| 35 | 9.627 | 263.08203 | [M+H]+ | 172.04001 221.08359 | -1.8926 | C16H10N2O2 | indirubin | Indoles and derivatives |
| 36 | 9.917 | 291.19559 | [M+H]+ | 131.03661 249.06406 | -0.4442 | C18H26O3 | 8-oxo-10,12-octadecadiynoic acid | Lipids and lipid-like molecules |
| 37 | 10.367 | 204.10248 | [M+H]+ | 109.10162 139.91376 | -2.9292 | C12H13NO2 | 5-(2-furanyl)-1,2,3,4,5,6-hexahydro-7H-cyclopenta[b]pyridin-7-one | Pyridines and derivatives |
| 38 | 11.151 | 263.082 | [M+H]+ | 132.04407 235.08693 | -1.8926 | C16H10N2O2 | indigo | Indoles and derivatives |
| 39 | 11.456 | 671.3252 | [M+H]+ | 275.08096 276.08505 | 3.1816 | C33H50O14 | UNPD35405 | Lipids and lipid-like molecules |
| 40 | 11.812 | 323.22168 | [M+H]+ | 219.09227 263.08218 | -0.0438 | C19H30O4 | 3-alpha-hydroxyayapanonic acid | Lipids and lipid-like molecules |
| 41 | 12.335 | 415.21188 | [M+H]+ | 119.08563 135.08086 | -2.0178 | C24H30O6 | UNPD49053 | Lipids and lipid-like molecules |
| 42 | 12.526 | 525.2453 | [M+K]+ | 119.08547 509.27216 | -0.7036 | C19H16O8 | 7-hydroxy-3,5,8-trimethoxy-3',4'-methylenedioxyflavone;2-(1,3-Benzodioxol-5-yl)-7-hydroxy-3,5,8-trimethoxy-4H-1-benzopyran-4-one | Organooxygen compounds |
| 43 | 12.855 | 715.32904 | [M+K]+ | 353.26862 629.22253 | -0.5512 | C33H56O14 | gingerglycolipid A | Lipids and lipid-like molecules |
| 44 | 13.029 | 518.32416 | [M+H]+ | 104.10735 500.3121 | -0.8502 | C26H48NO7P | lysoPC(18:3(6Z,9Z,12Z)) | Lipids and lipid-like molecules |
| 45 | 13.628 | 607.25372 | [M+H]+ | 172.03983 551.26593 | 0.1219 | C34H38O10 | scortechinone W | Benzopyrans |
| 46 | 13.759 | 609.26837 | [M+H]+ | 104.10721 609.26862 | 3.882 | C35H36N4O6 | 10-hydroxyphaeophorbide | Tetrapyrroles and derivatives |
| 47 | 14.151 | 537.30396 | [M+Na]+ | 149.13116 261.22104 | -0.3815 | C27H46O9 | UNPD123361 | Lipids and lipid-like molecules |
| 48 | 14.814 | 496.3396 | [M+H]+ | 184.07422 459.24805 | 0.3351 | C24H50NO7P | lysoPC(16:0) | Lipids and lipid-like molecules |
| 49 | 3.065 | 348.0719 | [M+H]+ | 120.04482 146.05881 | -4.4346 | C10H14N5O7P | adenosine monophosphate | Nucleosides, nucleotides, and analogues |
| 50 | 3.628 | 214.10802 | [M+H]+ | 183.10193 194.08115 | -2.8888 | C10H15NO4 | 2-amino-1-(4-hydroxy-3-methoxyphenyl)propane-1,3-diol | Alcohols and polyols |
| 51 | 4.387 | 233.09216 | [M+H]+ | 104.0501 172.0424 | -0.5657 | C12H12N2O3 | 4-(4-oxo-3,4-dihydroquinazolin-2-yl)butanoic acid | Diazanaphthalenes |
| 52 | 4.525 | 464.15262 | [M+Na]+ | 213.07684 317.08481 | 0.2648 | C20H27NO10 | mandelonitrile rutinoside | Organooxygen compounds |
| 53 | 4.785 | 571.16248 | [M+Na]+ | 127.03941 561.19244 | 1.5342 | C23H32O15 | sibiricose A6 | Phenylpropanoids and polyketides |
| 54 | 4.936 | 309.08832 | [M+H]+ | 121.05376 233.07109 | -4.2739 | C17H12N2O4 | cephalanthrin A | Indoles and derivatives |
| 55 | 5.28 | 760.30078 | [M+NH4]+ | 145.06448 255.10017 | 0.317 | C34H46O18 | UNPD168117 | Lignans, neolignans and related compounds |
| 56 | 5.455 | 700.25775 | [M+H]+ | 149.02415 409.18246 | 3.1196 | C35H41NO14 | terpene glycosides | Prenol lipids |
| 57 | 5.746 | 230.1748 | [M+H]+ | 137.06027 207.06581 | 1.1782 | C12H23NO3 | UNPD63456 | Fatty Acyls |
| 58 | 6.314 | 217.09804 | [M+H]+ | 147.05489 198.08849 | -3.9146 | C12H12N2O2 | 2,3-dihydro-1 H-pyrrolo[2,1 -Cl[1 ,4]benzodiazepine-5,11(10H,11H)-dione | Benzoxazoles |
| 59 | 6.324 | 258.07526 | [M+H]+ | 167.07068 215.08138 | 3.0509 | C14H11NO4 | 6-hydroxy-4-(5-hydroxymethylfuran-2-yl)quinolin-2(1H)-one | Quinolines and derivatives |
| 60 | 6.676 | 360.27383 | [M+H]+ | 109.10093 207.06552 | 1.8084 | C19H37NO5 | 2-hydroxylauroylcarnitine | Lipids and lipid-like molecules |
| 61 | 7.177 | 306.14502 | [M+H]+ | 147.05882 207.06488 | -0.5489 | C15H19N3O4 | anilinomethy gluco-phenylimidazole | Imidazopyridines |
| 62 | 7.441 | 289.10696 | [M+H]+ | 183.0804 251.07086 | 0.1739 | C16H16O5 | 3-(4-hydroxyphenyl)-6-methoxy-3,4-dihydro-2H-1-benzopyran-4,7-diol | Phenylpropanoids and polyketides |
| 63 | 8.45 | 350.08716 | [M+H]+ | 174.05508 247.08633 | -0.45 | C16H15NO8 | salfredin C3 | Indoles and derivatives |
| 64 | 9.308 | 322.1546 | [M+H]+ | 120.04451 168.08073 | 1.2558 | C19H19N3O2 | 1-[2-(hydroxymethyl)-1-benzimidazolyl]-3-(1-indolyl)-2-propanol | Indoles and derivatives |
| 65 | 10.321 | 291.19604 | [M+H]+ | 151.07574 262.07642 | -1.8226 | C18H26O3 | 8-oxo-10,12-octadecadiynoic acid | Lipids and lipid-like molecules |
| 66 | 11.014 | 293.21143 | [M+H]+ | 105.07052 281.05002 | 2.2775 | C18H28O3 | panaquinquecol 1 | Fatty Acyls |
| 67 | 11.636 | 374.19656 | [M+H]+ | 244.13374 270.14859 | -0.9547 | C21H27NO5 | 3-epi-2,18-dimethoxyschelhammericine | Alkaloids and derivatives |
| 68 | 12.258 | 365.26819 | [M+H]+ | 119.08571 135.08089 | 1.1972 | C19H32O4 | pironetin | Lipids and lipid-like molecules |
| 69 | 12.485 | 376.20209 | [M+H]+ | 121.05181 355.06924 | -0.3905 | C23H25N3O2 | 1-(3,5-dimethyl-1-pyrazolyl)-3-[2-(4-methoxyphenyl)-1-indolyl]-2-propanol | Indoles and derivatives |
| 70 | 12.884 | 446.25299 | [M+H]+ | 119.0856 437.19553 | 1.6043 | C25H35NO6 | UNPD10563 | Lipids and lipid-like molecules |
| 71 | 13.161 | 390.15985 | [M+H]+ | 130.06499 261.10266 | -0.6758 | C18H23N5O3S | 2-[[2-[(1-cyclohexyl-5-tetrazolyl)thio]-1-oxoethyl]amino]benzoic acid ethyl ester | Benzene and substituted derivatives |
| 72 | 13.632 | 391.26248 | [M+H]+ | 300.28888 385.1781 | 1.683 | C27H34O2 | UNPD94055 | Lipids and lipid-like molecules |
| 73 | 14.78 | 567.26019 | [M+H]+ | 518.32153 549.24921 | -0.006 | C33H34N4O5 | UNPD114209 | Tetrapyrroles and derivatives |

Supplementary Table 2. Target fishing of active ingredients of Ii.

| **Active ingredients** | **Targets** |
| --- | --- |
| 4(1H)-quinolone-3-carboxylic acid | CHRNA7 |
| 4(1H)-quinolone-3-carboxylic acid | AHR |
| 4(1H)-quinolone-3-carboxylic acid | MAOB |
| 4(1H)-quinolone-3-carboxylic acid | SLC16A1 |
| 4(1H)-quinolone-3-carboxylic acid | MAOA |
| 4(1H)-quinolone-3-carboxylic acid | CA7 |
| 4(1H)-quinolone-3-carboxylic acid | CA3 |
| 4(1H)-quinolone-3-carboxylic acid | CA14 |
| 4(1H)-quinolone-3-carboxylic acid | CA4 |
| 4(1H)-quinolone-3-carboxylic acid | CA5A |
| 4(1H)-quinolone-3-carboxylic acid | GABRA1 |
| 4(1H)-quinolone-3-carboxylic acid | GABRA3 |
| 4(1H)-quinolone-3-carboxylic acid | CA5B |
| 4(1H)-quinolone-3-carboxylic acid | CA13 |
| deoxyvasicinone | PTPN1 |
| deoxyvasicinone | SRD5A2 |
| deoxyvasicinone | DAO |
| deoxyvasicinone | IMPDH2 |
| deoxyvasicinone | PIM3 |
| deoxyvasicinone | HCAR2 |
| deoxyvasicinone | PIM2 |
| deoxyvasicinone | CYP2A6 |
| deoxyvasicinone | FTO |
| deoxyvasicinone | SLC22A12 |
| deoxyvasicinone | ERN1 |
| deoxyvasicinone | PLK1 |
| deoxyvasicinone | IKBKB |
| deoxyvasicinone | PTGS1 |
| deoxyvasicinone | CHRM3 |
| deoxyvasicinone | CHRM1 |
| deoxyvasicinone | ADRB1 |
| deoxyvasicinone | PTGS2 |
| deoxyvasicinone | ADRA2A |
| deoxyvasicinone | CA2 |
| deoxyvasicinone | PDE3A |
| deoxyvasicinone | ADRA1B |
| deoxyvasicinone | ADRB2 |
| deoxyvasicinone | SLC6A4 |
| deoxyvasicinone | GABRA1 |
| deoxyvasicinone | MAOB |
| deoxyvasicinone | QTRT1 |
| 2-amino-1-(4-hydroxy-3-methoxyphenyl)propane-1,3-diol | ADRB1 |
| 2-amino-1-(4-hydroxy-3-methoxyphenyl)propane-1,3-diol | ADRB2 |
| 2-amino-1-(4-hydroxy-3-methoxyphenyl)propane-1,3-diol | DRD2 |
| 2-amino-1-(4-hydroxy-3-methoxyphenyl)propane-1,3-diol | ADRA1A |
| 2-amino-1-(4-hydroxy-3-methoxyphenyl)propane-1,3-diol | AOC3 |
| 2-amino-1-(4-hydroxy-3-methoxyphenyl)propane-1,3-diol | ADRA2A |
| 2-amino-1-(4-hydroxy-3-methoxyphenyl)propane-1,3-diol | ADRA2C |
| 2-amino-1-(4-hydroxy-3-methoxyphenyl)propane-1,3-diol | ADRA2B |
| 2-amino-1-(4-hydroxy-3-methoxyphenyl)propane-1,3-diol | PNP |
| 2-amino-1-(4-hydroxy-3-methoxyphenyl)propane-1,3-diol | MTAP |
| 2-amino-1-(4-hydroxy-3-methoxyphenyl)propane-1,3-diol | GBA |
| 2-amino-1-(4-hydroxy-3-methoxyphenyl)propane-1,3-diol | ADK |
| 2-amino-1-(4-hydroxy-3-methoxyphenyl)propane-1,3-diol | ADRA1D |
| 2-amino-1-(4-hydroxy-3-methoxyphenyl)propane-1,3-diol | OPRM1 |
| 2-amino-1-(4-hydroxy-3-methoxyphenyl)propane-1,3-diol | MAN2B1 |
| cis-coniferin | ADORA1 |
| cis-coniferin | ADK |
| cis-coniferin | TYR |
| cis-coniferin | ADORA2A |
| cis-coniferin | ADORA3 |
| cis-coniferin | ADA |
| cis-coniferin | SLC5A2 |
| cis-coniferin | GBA |
| cis-coniferin | HRAS |
| cis-coniferin | IGFBP3 |
| cis-coniferin | TYMP |
| cis-coniferin | PNP |
| cis-coniferin | LGALS3 |
| cis-coniferin | LGALS9 |
| cis-coniferin | GSK3B |
| (1H-Indol-3-yl)oxoacetamide | CDK9 |
| (1H-Indol-3-yl)oxoacetamide | DYRK1A |
| (1H-Indol-3-yl)oxoacetamide | MB |
| (1H-Indol-3-yl)oxoacetamide | PARP1 |
| (1H-Indol-3-yl)oxoacetamide | CYP1A2 |
| (1H-Indol-3-yl)oxoacetamide | OPRL1 |
| (1H-Indol-3-yl)oxoacetamide | OPRD1 |
| (1H-Indol-3-yl)oxoacetamide | CA13 |
| (1H-Indol-3-yl)oxoacetamide | SRD5A1 |
| (1H-Indol-3-yl)oxoacetamide | IDO1 |
| (1H-Indol-3-yl)oxoacetamide | KMT5A |
| (1H-Indol-3-yl)oxoacetamide | TERT |
| (1H-Indol-3-yl)oxoacetamide | HMGCR |
| (1H-Indol-3-yl)oxoacetamide | GRM4 |
| (1H-Indol-3-yl)oxoacetamide | AOC3 |
| indiforine A | SLC5A4 |
| indiforine A | ADORA1 |
| indiforine A | ADORA2A |
| indiforine A | ADORA3 |
| indiforine A | SLC5A1 |
| indiforine A | HDAC1 |
| indiforine A | CA2 |
| indiforine A | CA1 |
| indiforine A | CA12 |
| indiforine A | CA14 |
| indiforine A | CA9 |
| indiforine A | SLC5A2 |
| indiforine A | SLC29A1 |
| indiforine A | HK2 |
| indiforine A | HK1 |
| 4-(4-oxo-3,4-dihydroquinazolin-2-yl)butanoic acid | PARP1 |
| 4-(4-oxo-3,4-dihydroquinazolin-2-yl)butanoic acid | OXER1 |
| 4-(4-oxo-3,4-dihydroquinazolin-2-yl)butanoic acid | ACE |
| 4-(4-oxo-3,4-dihydroquinazolin-2-yl)butanoic acid | MME |
| 4-(4-oxo-3,4-dihydroquinazolin-2-yl)butanoic acid | PTGS2 |
| 4-(4-oxo-3,4-dihydroquinazolin-2-yl)butanoic acid | PLA2G2A |
| 4-(4-oxo-3,4-dihydroquinazolin-2-yl)butanoic acid | AKR1B1 |
| 4-(4-oxo-3,4-dihydroquinazolin-2-yl)butanoic acid | MTNR1A |
| 4-(4-oxo-3,4-dihydroquinazolin-2-yl)butanoic acid | PARP10 |
| 4-(4-oxo-3,4-dihydroquinazolin-2-yl)butanoic acid | LCK |
| 4-(4-oxo-3,4-dihydroquinazolin-2-yl)butanoic acid | PTGS1 |
| 4-(4-oxo-3,4-dihydroquinazolin-2-yl)butanoic acid | ITGAL |
| 4-(4-oxo-3,4-dihydroquinazolin-2-yl)butanoic acid | CDC25B |
| 4-(4-oxo-3,4-dihydroquinazolin-2-yl)butanoic acid | ECE1 |
| 4-(4-oxo-3,4-dihydroquinazolin-2-yl)butanoic acid | CA2 |
| secoisolariciresinol diglucoside | PRKCD |
| secoisolariciresinol diglucoside | SHBG |
| secoisolariciresinol diglucoside | TYR |
| secoisolariciresinol diglucoside | PRKCG |
| secoisolariciresinol diglucoside | PRKCB |
| secoisolariciresinol diglucoside | PRKCE |
| secoisolariciresinol diglucoside | PRKCH |
| secoisolariciresinol diglucoside | PRKCQ |
| secoisolariciresinol diglucoside | PDE5A |
| secoisolariciresinol diglucoside | F2 |
| secoisolariciresinol diglucoside | F7 |
| secoisolariciresinol diglucoside | TDP1 |
| secoisolariciresinol diglucoside | SRD5A1 |
| secoisolariciresinol diglucoside | TOP1 |
| secoisolariciresinol diglucoside | IL2 |
| cephalanthrin A | PTGS2 |
| cephalanthrin A | AKR1B1 |
| cephalanthrin A | MME |
| cephalanthrin A | IMPDH2 |
| cephalanthrin A | CFTR |
| cephalanthrin A | SLC6A3 |
| cephalanthrin A | GSR |
| cephalanthrin A | ERBB2 |
| cephalanthrin A | GRK6 |
| cephalanthrin A | IDO1 |
| cephalanthrin A | ECE1 |
| cephalanthrin A | CTNNB1 |
| cephalanthrin A | CTSA |
| cephalanthrin A | AMPD3 |
| cephalanthrin A | ACLY |
| isatin | MAOA |
| isatin | MAOB |
| isatin | CES1 |
| isatin | TTR |
| isatin | CES2 |
| isatin | ALDH2 |
| isatin | ALDH1A1 |
| isatin | ALDH3A1 |
| isatin | CASP3 |
| isatin | LIG1 |
| isatin | BCHE |
| isatin | PTGER4 |
| isatin | CASP4 |
| isatin | CASP9 |
| isatin | TGM2 |
| isovitexin | CDK2 |
| isovitexin | MAOB |
| isovitexin | PTGS2 |
| isovitexin | AR |
| isovitexin | TOP2 |
| isovitexin | RELA |
| isovitexin | IKBKB |
| isovitexin | AKR1B1 |
| isovitexin | CA7 |
| isovitexin | CA12 |
| isovitexin | ABCB1 |
| isovitexin | TNF |
| isovitexin | ADORA1 |
| isovitexin | IL2 |
| isovitexin | XDH |
| isovitexin | EGFR |
| isovitexin | SLC29A1 |
| isovitexin | PRKCG |
| isovitexin | PRKCB |
| isovitexin | PRKCZ |
| isovitexin | AKT1 |
| isovitexin | PRKACA |
| 2,3-dihydro-1 H-pyrrolo[2,1 -Cl[1 ,4]benzodiazepine-5,11(10H,11H)-dione | CTSK |
| 2,3-dihydro-1 H-pyrrolo[2,1 -Cl[1 ,4]benzodiazepine-5,11(10H,11H)-dione | CTSS |
| 2,3-dihydro-1 H-pyrrolo[2,1 -Cl[1 ,4]benzodiazepine-5,11(10H,11H)-dione | CTSB |
| 2,3-dihydro-1 H-pyrrolo[2,1 -Cl[1 ,4]benzodiazepine-5,11(10H,11H)-dione | DPP4 |
| 2,3-dihydro-1 H-pyrrolo[2,1 -Cl[1 ,4]benzodiazepine-5,11(10H,11H)-dione | HTR2B |
| 2,3-dihydro-1 H-pyrrolo[2,1 -Cl[1 ,4]benzodiazepine-5,11(10H,11H)-dione | HMOX1 |
| 2,3-dihydro-1 H-pyrrolo[2,1 -Cl[1 ,4]benzodiazepine-5,11(10H,11H)-dione | NAAA |
| 2,3-dihydro-1 H-pyrrolo[2,1 -Cl[1 ,4]benzodiazepine-5,11(10H,11H)-dione | CDC25A |
| 2,3-dihydro-1 H-pyrrolo[2,1 -Cl[1 ,4]benzodiazepine-5,11(10H,11H)-dione | CDC25B |
| 2,3-dihydro-1 H-pyrrolo[2,1 -Cl[1 ,4]benzodiazepine-5,11(10H,11H)-dione | MAPK8 |
| 2,3-dihydro-1 H-pyrrolo[2,1 -Cl[1 ,4]benzodiazepine-5,11(10H,11H)-dione | CTSL |
| 2,3-dihydro-1 H-pyrrolo[2,1 -Cl[1 ,4]benzodiazepine-5,11(10H,11H)-dione | CSF1R |
| 2,3-dihydro-1 H-pyrrolo[2,1 -Cl[1 ,4]benzodiazepine-5,11(10H,11H)-dione | MAPK10 |
| 2,3-dihydro-1 H-pyrrolo[2,1 -Cl[1 ,4]benzodiazepine-5,11(10H,11H)-dione | PARP3 |
| 2,3-dihydro-1 H-pyrrolo[2,1 -Cl[1 ,4]benzodiazepine-5,11(10H,11H)-dione | TLR9 |
| secoisolariciresinol | F2 |
| secoisolariciresinol | ESR1 |
| secoisolariciresinol | PTGS2 |
| secoisolariciresinol | ACHE |
| secoisolariciresinol | ADRB2 |
| secoisolariciresinol | DPP4 |
| secoisolariciresinol | GSK3B |
| secoisolariciresinol | HSP90AB1 |
| secoisolariciresinol | PIM1 |
| secoisolariciresinol | CCNA2 |
| secoisolariciresinol | CAMKK1 |
| secoisolariciresinol | NOS3 |
| secoisolariciresinol | HTR1A |
| secoisolariciresinol | SHBG |
| secoisolariciresinol | NR3C1 |
| secoisolariciresinol | ALOX15 |
| secoisolariciresinol | TTR |
| secoisolariciresinol | IGF1R |
| secoisolariciresinol | SRC |
| secoisolariciresinol | ALOX12 |
| secoisolariciresinol | ALOX5 |
| secoisolariciresinol | POLA1 |
| secoisolariciresinol | CYP24A1 |
| secoisolariciresinol | CHEK1 |
| secoisolariciresinol | WEE1 |
| secoisolariciresinol | MAP2K1 |
| secoisolariciresinol | KDR |
| 1-methoxy-3-indoleacetic acid | PARP1 |
| 1-methoxy-3-indoleacetic acid | CA12 |
| 1-methoxy-3-indoleacetic acid | CA9 |
| 1-methoxy-3-indoleacetic acid | PARP2 |
| 1-methoxy-3-indoleacetic acid | CPA1 |
| 1-methoxy-3-indoleacetic acid | HSPA1A |
| 1-methoxy-3-indoleacetic acid | SLC6A4 |
| 1-methoxy-3-indoleacetic acid | CPB2 |
| 1-methoxy-3-indoleacetic acid | PDE9A |
| 1-methoxy-3-indoleacetic acid | CPN1 |
| 1-methoxy-3-indoleacetic acid | ACE |
| 1-methoxy-3-indoleacetic acid | MME |
| 1-methoxy-3-indoleacetic acid | NOTUM |
| 1-methoxy-3-indoleacetic acid | MMP13 |
| 1-methoxy-3-indoleacetic acid | MMP12 |
| corchorifatty acid B | PPARG |
| corchorifatty acid B | LTB4R |
| corchorifatty acid B | ACHE |
| corchorifatty acid B | MAPK14 |
| corchorifatty acid B | BACE1 |
| corchorifatty acid B | RARG |
| corchorifatty acid B | RARB |
| corchorifatty acid B | RORC |
| corchorifatty acid B | HTR2B |
| corchorifatty acid B | ADRA2B |
| corchorifatty acid B | RORB |
| corchorifatty acid B | RORA |
| corchorifatty acid B | RARA |
| corchorifatty acid B | RXRA |
| corchorifatty acid B | SRD5A2 |
| Indirubin | NOS3 |
| Indirubin | PTGS1 |
| Indirubin | ESR1 |
| Indirubin | AR |
| Indirubin | PTGS2 |
| Indirubin | RXRA |
| Indirubin | GABRA1 |
| Indirubin | MAPK14 |
| Indirubin | GSK3B |
| Indirubin | HSP90AB1 |
| Indirubin | CDK2 |
| Indirubin | PIK3CG |
| Indirubin | CHEK1 |
| Indirubin | PRKACA |
| Indirubin | PIM1 |
| Indirubin | CCNA2 |
| Indirubin | CHRM1 |
| Indirubin | PDE3A |
| Indirubin | SCN5A |
| Indirubin | PPARG |
| Indirubin | CA2 |
| Indirubin | ACHE |
| Indirubin | ADRB2 |
| Indirubin | CHRNA7 |
| Indirubin | PRSS1 |
| Indirubin | YP1A1 |
| Indirubin | IFNG |
| Indirubin | AHR |
| Indirubin | CCL5 |
| Indirubin | NQO2 |
| Indirubin | CDKN3 |
| Indirubin | FLT3 |
| Indirubin | CDK5R1 |
| Indirubin | CCNB3 |
| Indirubin | CDK1 |
| Indirubin | CDK4 |
| Indirubin | AURKB |
| Indirubin | AURKC |
| Indirubin | AURKA |
| Indirubin | KCNMA1 |
| Indirubin | CA1 |
| Indirubin | CA12 |
| Indirubin | CA9 |
| Indirubin | NQO1 |
| Indigo | PTGS1 |
| Indigo | PTGS2 |
| Indigo | RXRA |
| Indigo | CDK2 |
| Indigo | PRKACA |
| Indigo | PIM1 |
| Indigo | CCNB3 |
| Indigo | CA2 |
| Indigo | CA12 |
| Indigo | CA9 |
| Indigo | MECP2 |
| Indigo | MBD2 |
| Indigo | CTSG |
| Indigo | CMA1 |
| Indigo | FLT3 |
| Indigo | KCNMA1 |
| Indigo | CDK5R1 |
| Indigo | KDR |
| Indigo | ALOX5 |
| Indigo | NQO1 |
| Indigo | NQO2 |

Supplementary table 3. First 1000 targets predicted to be relevant to inflammation.

| **Gene Symbol** | **Description** | **Relevance Score** |
| --- | --- | --- |
| NOD2 | Nucleotide Binding Oligomerization Domain Containing 2 | 115.97 |
| TNF | Tumor Necrosis Factor | 91.98 |
| IL6 | Interleukin 6 | 91.93 |
| IL10 | Interleukin 10 | 87.08 |
| IL10RA | Interleukin 10 Receptor Subunit Alpha | 77.68 |
| TLR4 | Toll Like Receptor 4 | 70.91 |
| NLRP3 | NLR Family Pyrin Domain Containing 3 | 63.56 |
| PTGS2 | Prostaglandin-Endoperoxide Synthase 2 | 61.01 |
| HLA-DRB1 | Major Histocompatibility Complex, Class II, DR Beta 1 | 59.88 |
| IL10RB | Interleukin 10 Receptor Subunit Beta | 57.85 |
| TGFB1 | Transforming Growth Factor Beta 1 | 56.21 |
| ADAM17 | ADAM Metallopeptidase Domain 17 | 56.1 |
| IL1B | Interleukin 1 Beta | 55.42 |
| TLR2 | Toll Like Receptor 2 | 54.44 |
| IL1RN | Interleukin 1 Receptor Antagonist | 53.38 |
| TNFRSF1A | TNF Receptor Superfamily Member 1A | 50.92 |
| CRP | C-Reactive Protein | 50 |
| IL23R | Interleukin 23 Receptor | 48.97 |
| IL13 | Interleukin 13 | 48.67 |
| PRTN3 | Proteinase 3 | 47.62 |
| CXCL8 | C-X-C Motif Chemokine Ligand 8 | 47.35 |
| HLA-B | Major Histocompatibility Complex, Class I, B | 46.92 |
| MEFV | MEFV Innate Immuity Regulator, Pyrin | 45.81 |
| ELANE | Elastase, Neutrophil Expressed | 45.53 |
| CTLA4 | Cytotoxic T-Lymphocyte Associated Protein 4 | 44.73 |
| MIF | Macrophage Migration Inhibitory Factor | 43.77 |
| FOXP3 | Forkhead Box P3 | 43.67 |
| RIPK1 | Receptor Interacting Serine/Threonine Kinase 1 | 42.83 |
| PTGS1 | Prostaglandin-Endoperoxide Synthase 1 | 42.33 |
| IL2RA | Interleukin 2 Receptor Subunit Alpha | 41.64 |
| IFNG | Interferon Gamma | 40.62 |
| PTPN22 | Protein Tyrosine Phosphatase Non-Receptor Type 22 | 40.22 |
| PSTPIP1 | Proline-Serine-Threonine Phosphatase Interacting Protein 1 | 39.52 |
| FAS | Fas Cell Surface Death Receptor | 39.31 |
| CCL2 | C-C Motif Chemokine Ligand 2 | 37.66 |
| IL1A | Interleukin 1 Alpha | 37.26 |
| TLR3 | Toll Like Receptor 3 | 37.22 |
| ATG16L1 | Autophagy Related 16 Like 1 | 36.76 |
| IL12B | Interleukin 12B | 36.36 |
| STAT1 | Signal Transducer And Activator Of Transcription 1 | 36.26 |
| TLR5 | Toll Like Receptor 5 | 36.21 |
| STAT3 | Signal Transducer And Activator Of Transcription 3 | 36.14 |
| ABCB1 | ATP Binding Cassette Subfamily B Member 1 | 35.75 |
| IL17A | Interleukin 17A | 35.58 |
| CCR5 | C-C Motif Chemokine Receptor 5 | 35.53 |
| HLA-DQB1 | Major Histocompatibility Complex, Class II, DQ Beta 1 | 35.51 |
| HLA-DQA1 | Major Histocompatibility Complex, Class II, DQ Alpha 1 | 35.17 |
| CCL11 | C-C Motif Chemokine Ligand 11 | 34.9 |
| IL4 | Interleukin 4 | 34.7 |
| CD40LG | CD40 Ligand | 34.57 |
| ALOX5 | Arachidonate 5-Lipoxygenase | 34.27 |
| FASLG | Fas Ligand | 34.15 |
| CCL3 | C-C Motif Chemokine Ligand 3 | 34.12 |
| LTA | Lymphotoxin Alpha | 34.06 |
| NLRP1 | NLR Family Pyrin Domain Containing 1 | 33.71 |
| MMP1 | Matrix Metallopeptidase 1 | 33.24 |
| BTNL2 | Butyrophilin Like 2 | 33.2 |
| CCR6 | C-C Motif Chemokine Receptor 6 | 33.07 |
| IRF5 | Interferon Regulatory Factor 5 | 32.95 |
| IL2 | Interleukin 2 | 32.64 |
| HLA-DPB1 | Major Histocompatibility Complex, Class II, DP Beta 1 | 32.61 |
| IRGM | Immunity Related GTPase M | 32.34 |
| CCR1 | C-C Motif Chemokine Receptor 1 | 32.34 |
| STAT4 | Signal Transducer And Activator Of Transcription 4 | 31.99 |
| TNFAIP3 | TNF Alpha Induced Protein 3 | 31.73 |
| MBL2 | Mannose Binding Lectin 2 | 31.69 |
| EGFR | Epidermal Growth Factor Receptor | 31.43 |
| HLA-A | Major Histocompatibility Complex, Class I, A | 31.29 |
| ALB | Albumin | 31.18 |
| IL5 | Interleukin 5 | 31.06 |
| IL18 | Interleukin 18 | 30.87 |
| CCL4 | C-C Motif Chemokine Ligand 4 | 30.37 |
| SERPINA1 | Serpin Family A Member 1 | 30.1 |
| ITGAM | Integrin Subunit Alpha M | 29.92 |
| ICAM1 | Intercellular Adhesion Molecule 1 | 29.86 |
| NLRP12 | NLR Family Pyrin Domain Containing 12 | 29.7 |
| MPO | Myeloperoxidase | 29.68 |
| TNFRSF1B | TNF Receptor Superfamily Member 1B | 29.68 |
| IKBKB | Inhibitor Of Nuclear Factor Kappa B Kinase Subunit Beta | 29.6 |
| LACC1 | Laccase Domain Containing 1 | 29.54 |
| CCL5 | C-C Motif Chemokine Ligand 5 | 29.51 |
| TP53 | Tumor Protein P53 | 29.42 |
| CIITA | Class II Major Histocompatibility Complex Transactivator | 29.36 |
| HLA-C | Major Histocompatibility Complex, Class I, C | 29.19 |
| NFKBIA | NFKB Inhibitor Alpha | 29 |
| FCGR2A | Fc Fragment Of IgG Receptor IIa | 28.91 |
| MMP2 | Matrix Metallopeptidase 2 | 28.91 |
| MVK | Mevalonate Kinase | 28.75 |
| IL1R1 | Interleukin 1 Receptor Type 1 | 28.72 |
| ADIPOQ | Adiponectin, C1Q And Collagen Domain Containing | 28.63 |
| MIR155 | MicroRNA 155 | 28.52 |
| ITGB2 | Integrin Subunit Beta 2 | 28.27 |
| CARD14 | Caspase Recruitment Domain Family Member 14 | 28.18 |
| IFIH1 | Interferon Induced With Helicase C Domain 1 | 28.1 |
| MAPK14 | Mitogen-Activated Protein Kinase 14 | 28.08 |
| JAK2 | Janus Kinase 2 | 27.56 |
| CAPN5 | Calpain 5 | 27.49 |
| MMP9 | Matrix Metallopeptidase 9 | 27.35 |
| HLA-DPA1 | Major Histocompatibility Complex, Class II, DP Alpha 1 | 27.06 |
| PLG | Plasminogen | 26.91 |
| IL12RB1 | Interleukin 12 Receptor Subunit Beta 1 | 26.87 |
| ERAP1 | Endoplasmic Reticulum Aminopeptidase 1 | 26.87 |
| CFTR | CF Transmembrane Conductance Regulator | 26.85 |
| NLRC4 | NLR Family CARD Domain Containing 4 | 26.75 |
| MIR21 | MicroRNA 21 | 26.63 |
| TGFB2 | Transforming Growth Factor Beta 2 | 26.57 |
| HMGB1 | High Mobility Group Box 1 | 26.54 |
| VCAM1 | Vascular Cell Adhesion Molecule 1 | 26.42 |
| FLG | Filaggrin | 26.34 |
| MYD88 | MYD88 Innate Immune Signal Transduction Adaptor | 26.16 |
| PDGFRA | Platelet Derived Growth Factor Receptor Alpha | 26.11 |
| IAH1 | Isoamyl Acetate Hydrolyzing Esterase 1 (Putative) | 25.77 |
| ADA | Adenosine Deaminase | 25.76 |
| SLC22A4 | Solute Carrier Family 22 Member 4 | 25.72 |
| C4A | Complement C4A (Rodgers Blood Group) | 25.69 |
| IL21 | Interleukin 21 | 25.62 |
| SELE | Selectin E | 25.56 |
| SPP1 | Secreted Phosphoprotein 1 | 25.56 |
| INAVA | Innate Immunity Activator | 25.49 |
| INS | Insulin | 25.37 |
| CXCL10 | C-X-C Motif Chemokine Ligand 10 | 25.2 |
| PPARG | Peroxisome Proliferator Activated Receptor Gamma | 25.11 |
| PLA2G7 | Phospholipase A2 Group VII | 25.1 |
| S100A9 | S100 Calcium Binding Protein A9 | 25.08 |
| ADA2 | Adenosine Deaminase 2 | 25.07 |
| TNFSF15 | TNF Superfamily Member 15 | 24.46 |
| NFKB1 | Nuclear Factor Kappa B Subunit 1 | 24.38 |
| NOS2 | Nitric Oxide Synthase 2 | 24.37 |
| FCGR3B | Fc Fragment Of IgG Receptor IIIb | 24.35 |
| F5 | Coagulation Factor V | 24.31 |
| EPX | Eosinophil Peroxidase | 24.26 |
| CSF2 | Colony Stimulating Factor 2 | 24.06 |
| CD4 | CD4 Molecule | 24 |
| HMOX1 | Heme Oxygenase 1 | 24 |
| PSEN1 | Presenilin 1 | 23.96 |
| CD40 | CD40 Molecule | 23.93 |
| LEP | Leptin | 23.83 |
| CD28 | CD28 Molecule | 23.55 |
| CD19 | CD19 Molecule | 23.51 |
| NR3C1 | Nuclear Receptor Subfamily 3 Group C Member 1 | 23.39 |
| TRAF3IP2 | TRAF3 Interacting Protein 2 | 23.39 |
| VEGFA | Vascular Endothelial Growth Factor A | 23.37 |
| CCL20 | C-C Motif Chemokine Ligand 20 | 23.24 |
| CDSN | Corneodesmosin | 23.17 |
| MUC1 | Mucin 1, Cell Surface Associated | 23.16 |
| DNASE1 | Deoxyribonuclease 1 | 23.12 |
| MST1 | Macrophage Stimulating 1 | 23.08 |
| CYBA | Cytochrome B-245 Alpha Chain | 22.9 |
| IL12A | Interleukin 12A | 22.79 |
| SPINK5 | Serine Peptidase Inhibitor Kazal Type 5 | 22.7 |
| PMP22 | Peripheral Myelin Protein 22 | 22.65 |
| XIAP | X-Linked Inhibitor Of Apoptosis | 22.64 |
| IL19 | Interleukin 19 | 22.44 |
| RNASE3 | Ribonuclease A Family Member 3 | 22.42 |
| TLR9 | Toll Like Receptor 9 | 22.42 |
| IRF1 | Interferon Regulatory Factor 1 | 22.24 |
| CXCL2 | C-X-C Motif Chemokine Ligand 2 | 22.04 |
| TBX21 | T-Box Transcription Factor 21 | 21.93 |
| FCGR2B | Fc Fragment Of IgG Receptor IIb | 21.87 |
| IKBKG | Inhibitor Of Nuclear Factor Kappa B Kinase Regulatory Subunit Gamma | 21.84 |
| AIRE | Autoimmune Regulator | 21.82 |
| C3 | Complement C3 | 21.64 |
| F2 | Coagulation Factor II, Thrombin | 21.59 |
| SMAD3 | SMAD Family Member 3 | 21.54 |
| TREX1 | Three Prime Repair Exonuclease 1 | 21.41 |
| ICOSLG | Inducible T Cell Costimulator Ligand | 21.38 |
| CR2 | Complement C3d Receptor 2 | 21.37 |
| SMIM35 | Small Integral Membrane Protein 35 | 21.37 |
| S100A8 | S100 Calcium Binding Protein A8 | 21.33 |
| ARPC1B | Actin Related Protein 2/3 Complex Subunit 1B | 21.31 |
| SAA1 | Serum Amyloid A1 | 21.03 |
| APOE | Apolipoprotein E | 20.99 |
| PADI4 | Peptidyl Arginine Deiminase 4 | 20.95 |
| TTC7A | Tetratricopeptide Repeat Domain 7A | 20.88 |
| LTF | Lactotransferrin | 20.86 |
| MIR146A | MicroRNA 146a | 20.81 |
| CLEC7A | C-Type Lectin Domain Containing 7A | 20.79 |
| CD79A | CD79a Molecule | 20.74 |
| IL36RN | Interleukin 36 Receptor Antagonist | 20.68 |
| CTNNB1 | Catenin Beta 1 | 20.65 |
| KRT14 | Keratin 14 | 20.6 |
| DNASE1L3 | Deoxyribonuclease 1 Like 3 | 20.57 |
| IL15 | Interleukin 15 | 20.56 |
| IL22 | Interleukin 22 | 20.53 |
| CXCR4 | C-X-C Motif Chemokine Receptor 4 | 20.48 |
| KIT | KIT Proto-Oncogene, Receptor Tyrosine Kinase | 20.47 |
| AIF1 | Allograft Inflammatory Factor 1 | 20.44 |
| LPIN2 | Lipin 2 | 20.4 |
| IFNB1 | Interferon Beta 1 | 20.38 |
| TTR | Transthyretin | 20.34 |
| IL2RB | Interleukin 2 Receptor Subunit Beta | 20.32 |
| CASP1 | Caspase 1 | 20.31 |
| ANXA1 | Annexin A1 | 20.23 |
| CSF1 | Colony Stimulating Factor 1 | 20.21 |
| S100A12 | S100 Calcium Binding Protein A12 | 20.17 |
| ZAP70 | Zeta Chain Of T Cell Receptor Associated Protein Kinase 70 | 20.14 |
| IL1RAPL2 | Interleukin 1 Receptor Accessory Protein Like 2 | 20.1 |
| CXCR3 | C-X-C Motif Chemokine Receptor 3 | 20.08 |
| PLA2G2A | Phospholipase A2 Group IIA | 19.99 |
| CXCL1 | C-X-C Motif Chemokine Ligand 1 | 19.82 |
| CD55 | CD55 Molecule (Cromer Blood Group) | 19.76 |
| LRBA | LPS Responsive Beige-Like Anchor Protein | 19.74 |
| SLC9A3 | Solute Carrier Family 9 Member A3 | 19.65 |
| OTULIN | OTU Deubiquitinase With Linear Linkage Specificity | 19.62 |
| CSF3 | Colony Stimulating Factor 3 | 19.57 |
| GNE | Glucosamine (UDP-N-Acetyl)-2-Epimerase/N-Acetylmannosamine Kinase | 19.54 |
| HPGD | 15-Hydroxyprostaglandin Dehydrogenase | 19.53 |
| TNIP1 | TNFAIP3 Interacting Protein 1 | 19.52 |
| PDCD1 | Programmed Cell Death 1 | 19.49 |
| SELP | Selectin P | 19.43 |
| HP | Haptoglobin | 19.39 |
| HAVCR2 | Hepatitis A Virus Cellular Receptor 2 | 19.23 |
| MUC5B | Mucin 5B, Oligomeric Mucus/Gel-Forming | 19.14 |
| TIMP1 | TIMP Metallopeptidase Inhibitor 1 | 19.1 |
| CXCL9 | C-X-C Motif Chemokine Ligand 9 | 19.08 |
| F2RL1 | F2R Like Trypsin Receptor 1 | 19.04 |
| FOXJ1 | Forkhead Box J1 | 19.02 |
| PTPN2 | Protein Tyrosine Phosphatase Non-Receptor Type 2 | 19 |
| IRAK1 | Interleukin 1 Receptor Associated Kinase 1 | 18.99 |
| COX5A | Cytochrome C Oxidase Subunit 5A | 18.92 |
| HLA-G | Major Histocompatibility Complex, Class I, G | 18.89 |
| CHI3L1 | Chitinase 3 Like 1 | 18.83 |
| IL4R | Interleukin 4 Receptor | 18.76 |
| RASGRP1 | RAS Guanyl Releasing Protein 1 | 18.65 |
| SERPINA3 | Serpin Family A Member 3 | 18.62 |
| CD163 | CD163 Molecule | 18.59 |
| BDNF | Brain Derived Neurotrophic Factor | 18.59 |
| CAPN3 | Calpain 3 | 18.57 |
| C4B | Complement C4B (Chido Blood Group) | 18.57 |
| DYSF | Dysferlin | 18.54 |
| PSMB8 | Proteasome 20S Subunit Beta 8 | 18.52 |
| FOS | Fos Proto-Oncogene, AP-1 Transcription Factor Subunit | 18.5 |
| PIK3CA | Phosphatidylinositol-4,5-Bisphosphate 3-Kinase Catalytic Subunit Alpha | 18.44 |
| ACP5 | Acid Phosphatase 5, Tartrate Resistant | 18.43 |
| IL23A | Interleukin 23 Subunit Alpha | 18.41 |
| CTSG | Cathepsin G | 18.39 |
| GATA3 | GATA Binding Protein 3 | 18.39 |
| IFNA1 | Interferon Alpha 1 | 18.33 |
| WAS | WASP Actin Nucleation Promoting Factor | 18.33 |
| TREM1 | Triggering Receptor Expressed On Myeloid Cells 1 | 18.31 |
| IL7 | Interleukin 7 | 18.3 |
| RYR1 | Ryanodine Receptor 1 | 18.22 |
| TGM5 | Transglutaminase 5 | 18.22 |
| IL37 | Interleukin 37 | 18.09 |
| CD14 | CD14 Molecule | 18.08 |
| TGFBR2 | Transforming Growth Factor Beta Receptor 2 | 18.05 |
| APC | APC Regulator Of WNT Signaling Pathway | 18 |
| THBD | Thrombomodulin | 18 |
| PTPRC | Protein Tyrosine Phosphatase Receptor Type C | 17.98 |
| CAT | Catalase | 17.95 |
| C1S | Complement C1s | 17.95 |
| BACH2 | BTB Domain And CNC Homolog 2 | 17.92 |
| SLC37A4 | Solute Carrier Family 37 Member 4 | 17.91 |
| SELL | Selectin L | 17.88 |
| CCR3 | C-C Motif Chemokine Receptor 3 | 17.85 |
| GDF15 | Growth Differentiation Factor 15 | 17.84 |
| TLR6 | Toll Like Receptor 6 | 17.83 |
| PTGER2 | Prostaglandin E Receptor 2 | 17.78 |
| STING1 | Stimulator Of Interferon Response CGAMP Interactor 1 | 17.77 |
| CD8A | CD8a Molecule | 17.76 |
| TPMT | Thiopurine S-Methyltransferase | 17.76 |
| PRKCQ | Protein Kinase C Theta | 17.69 |
| HSPD1 | Heat Shock Protein Family D (Hsp60) Member 1 | 17.68 |
| MIR126 | MicroRNA 126 | 17.68 |
| MMP3 | Matrix Metallopeptidase 3 | 17.65 |
| IL33 | Interleukin 33 | 17.57 |
| CD80 | CD80 Molecule | 17.56 |
| APP | Amyloid Beta Precursor Protein | 17.55 |
| MYO9B | Myosin IXB | 17.54 |
| NGF | Nerve Growth Factor | 17.52 |
| IL17RA | Interleukin 17 Receptor A | 17.51 |
| TNFSF11 | TNF Superfamily Member 11 | 17.49 |
| CCR2 | C-C Motif Chemokine Receptor 2 | 17.44 |
| TNFRSF13C | TNF Receptor Superfamily Member 13C | 17.42 |
| AGER | Advanced Glycosylation End-Product Specific Receptor | 17.42 |
| SPINK1 | Serine Peptidase Inhibitor Kazal Type 1 | 17.42 |
| IL17F | Interleukin 17F | 17.39 |
| NCF4 | Neutrophil Cytosolic Factor 4 | 17.36 |
| PIK3CG | Phosphatidylinositol-4,5-Bisphosphate 3-Kinase Catalytic Subunit Gamma | 17.25 |
| CSTA | Cystatin A | 17.24 |
| CASP8 | Caspase 8 | 17.24 |
| MBTPS2 | Membrane Bound Transcription Factor Peptidase, Site 2 | 17.1 |
| MIR145 | MicroRNA 145 | 17.07 |
| TSLP | Thymic Stromal Lymphopoietin | 17.06 |
| JUN | Jun Proto-Oncogene, AP-1 Transcription Factor Subunit | 16.99 |
| AKT1 | AKT Serine/Threonine Kinase 1 | 16.96 |
| ACE | Angiotensin I Converting Enzyme | 16.95 |
| TBK1 | TANK Binding Kinase 1 | 16.94 |
| CXCL5 | C-X-C Motif Chemokine Ligand 5 | 16.94 |
| ALK | ALK Receptor Tyrosine Kinase | 16.89 |
| DMD | Dystrophin | 16.87 |
| IL7R | Interleukin 7 Receptor | 16.8 |
| CYBB | Cytochrome B-245 Beta Chain | 16.79 |
| DEFB4A | Defensin Beta 4A | 16.72 |
| GPT | Glutamic--Pyruvic Transaminase | 16.62 |
| NEB | Nebulin | 16.62 |
| PTX3 | Pentraxin 3 | 16.61 |
| KNG1 | Kininogen 1 | 16.59 |
| TERT | Telomerase Reverse Transcriptase | 16.58 |
| CREB1 | CAMP Responsive Element Binding Protein 1 | 16.56 |
| IL3 | Interleukin 3 | 16.52 |
| ITCH | Itchy E3 Ubiquitin Protein Ligase | 16.47 |
| KLRC4 | Killer Cell Lectin Like Receptor C4 | 16.45 |
| IL12A-AS1 | IL12A Antisense RNA 1 | 16.45 |
| LPL | Lipoprotein Lipase | 16.45 |
| ETS1 | ETS Proto-Oncogene 1, Transcription Factor | 16.45 |
| F3 | Coagulation Factor III, Tissue Factor | 16.45 |
| IL11 | Interleukin 11 | 16.41 |
| UBAC2 | UBA Domain Containing 2 | 16.38 |
| IBD25 | Inflammatory Bowel Disease-25 | 16.29 |
| FCGR3A | Fc Fragment Of IgG Receptor IIIa | 16.29 |
| KRAS | KRAS Proto-Oncogene, GTPase | 16.28 |
| SH2D1A | SH2 Domain Containing 1A | 16.16 |
| MIR122 | MicroRNA 122 | 16.13 |
| CDH1 | Cadherin 1 | 16.11 |
| NOD1 | Nucleotide Binding Oligomerization Domain Containing 1 | 16.05 |
| CD27 | CD27 Molecule | 16.02 |
| LCN2 | Lipocalin 2 | 16.01 |
| CD86 | CD86 Molecule | 15.96 |
| SERPINE1 | Serpin Family E Member 1 | 15.92 |
| CHUK | Component Of Inhibitor Of Nuclear Factor Kappa B Kinase Complex | 15.9 |
| MIR150 | MicroRNA 150 | 15.87 |
| ITGAL | Integrin Subunit Alpha L | 15.83 |
| IBD5 | Inflammatory Bowel Disease 5 | 15.81 |
| PSMB9 | Proteasome 20S Subunit Beta 9 | 15.78 |
| SAMHD1 | SAM And HD Domain Containing Deoxynucleoside Triphosphate Triphosphohydrolase 1 | 15.77 |
| CXCL12 | C-X-C Motif Chemokine Ligand 12 | 15.76 |
| APOA1 | Apolipoprotein A1 | 15.7 |
| HSPA1L | Heat Shock Protein Family A (Hsp70) Member 1 Like | 15.69 |
| RELA | RELA Proto-Oncogene, NF-KB Subunit | 15.65 |
| PLCG2 | Phospholipase C Gamma 2 | 15.63 |
| MAPK8 | Mitogen-Activated Protein Kinase 8 | 15.62 |
| TEK | TEK Receptor Tyrosine Kinase | 15.61 |
| PYCARD | PYD And CARD Domain Containing | 15.61 |
| ITGA4 | Integrin Subunit Alpha 4 | 15.59 |
| TNFRSF13B | TNF Receptor Superfamily Member 13B | 15.55 |
| CYP2C9 | Cytochrome P450 Family 2 Subfamily C Member 9 | 15.54 |
| NCF1 | Neutrophil Cytosolic Factor 1 | 15.51 |
| RBCK1 | RANBP2-Type And C3HC4-Type Zinc Finger Containing 1 | 15.51 |
| MASP2 | Mannan Binding Lectin Serine Peptidase 2 | 15.5 |
| PRSS1 | Serine Protease 1 | 15.48 |
| FLG2 | Filaggrin Family Member 2 | 15.39 |
| TNFSF12 | TNF Superfamily Member 12 | 15.35 |
| CCL22 | C-C Motif Chemokine Ligand 22 | 15.32 |
| CD36 | CD36 Molecule | 15.3 |
| IBD3 | Inflammatory Bowel Disease 3 | 15.29 |
| APOH | Apolipoprotein H | 15.28 |
| COL1A1 | Collagen Type I Alpha 1 Chain | 15.27 |
| TTN | Titin | 15.25 |
| RANBP2 | RAN Binding Protein 2 | 15.24 |
| IL9 | Interleukin 9 | 15.22 |
| B2M | Beta-2-Microglobulin | 15.19 |
| ADRB2 | Adrenoceptor Beta 2 | 15.18 |
| POLA1 | DNA Polymerase Alpha 1, Catalytic Subunit | 15.18 |
| CYSLTR2 | Cysteinyl Leukotriene Receptor 2 | 15.17 |
| CAMP | Cathelicidin Antimicrobial Peptide | 15.15 |
| GUCY2C | Guanylate Cyclase 2C | 15.15 |
| CTSB | Cathepsin B | 15.13 |
| NCF2 | Neutrophil Cytosolic Factor 2 | 15.12 |
| CCL19 | C-C Motif Chemokine Ligand 19 | 15.11 |
| RETN | Resistin | 15.1 |
| TLR1 | Toll Like Receptor 1 | 15.1 |
| SFTPC | Surfactant Protein C | 15.09 |
| PPARA | Peroxisome Proliferator Activated Receptor Alpha | 15.09 |
| SLC11A1 | Solute Carrier Family 11 Member 1 | 15.05 |
| TNFSF13B | TNF Superfamily Member 13b | 15.01 |
| TCF4 | Transcription Factor 4 | 14.97 |
| FERMT1 | Fermitin Family Member 1 | 14.95 |
| CASR | Calcium Sensing Receptor | 14.94 |
| IBD2 | Inflammatory Bowel Disease 2 | 14.92 |
| ADAR | Adenosine Deaminase RNA Specific | 14.91 |
| BGLAP | Bone Gamma-Carboxyglutamate Protein | 14.82 |
| CASP10 | Caspase 10 | 14.73 |
| IL18R1 | Interleukin 18 Receptor 1 | 14.73 |
| MPZ | Myelin Protein Zero | 14.71 |
| PRKCD | Protein Kinase C Delta | 14.7 |
| IBD7 | Inflammatory Bowel Disease 7 | 14.66 |
| PDE4A | Phosphodiesterase 4A | 14.64 |
| FLNA | Filamin A | 14.63 |
| CP | Ceruloplasmin | 14.63 |
| SERPINB1 | Serpin Family B Member 1 | 14.61 |
| SLPI | Secretory Leukocyte Peptidase Inhibitor | 14.6 |
| CD244 | CD244 Molecule | 14.56 |
| TGFBR1 | Transforming Growth Factor Beta Receptor 1 | 14.55 |
| CASP3 | Caspase 3 | 14.53 |
| F13A1 | Coagulation Factor XIII A Chain | 14.52 |
| GNAQ | G Protein Subunit Alpha Q | 14.5 |
| IGHE | Immunoglobulin Heavy Constant Epsilon | 14.49 |
| XDH | Xanthine Dehydrogenase | 14.49 |
| FGFR2 | Fibroblast Growth Factor Receptor 2 | 14.48 |
| CCL17 | C-C Motif Chemokine Ligand 17 | 14.48 |
| CX3CL1 | C-X3-C Motif Chemokine Ligand 1 | 14.45 |
| CD44 | CD44 Molecule (Indian Blood Group) | 14.44 |
| CARMIL2 | Capping Protein Regulator And Myosin 1 Linker 2 | 14.44 |
| TSC22D3 | TSC22 Domain Family Member 3 | 14.39 |
| ABCB4 | ATP Binding Cassette Subfamily B Member 4 | 14.38 |
| LCK | LCK Proto-Oncogene, Src Family Tyrosine Kinase | 14.35 |
| POMC | Proopiomelanocortin | 14.32 |
| DNAL1 | Dynein Axonemal Light Chain 1 | 14.26 |
| TLR7 | Toll Like Receptor 7 | 14.25 |
| SFTPA2 | Surfactant Protein A2 | 14.25 |
| IBD9 | Inflammatory Bowel Disease 9 | 14.22 |
| TGFB3 | Transforming Growth Factor Beta 3 | 14.21 |
| MMEL1 | Membrane Metalloendopeptidase Like 1 | 14.19 |
| CXCR2 | C-X-C Motif Chemokine Receptor 2 | 14.18 |
| GZMB | Granzyme B | 14.14 |
| SCGB1A1 | Secretoglobin Family 1A Member 1 | 14.14 |
| PRG4 | Proteoglycan 4 | 14.13 |
| EPCAM | Epithelial Cell Adhesion Molecule | 14.11 |
| MAPK1 | Mitogen-Activated Protein Kinase 1 | 14.1 |
| IBD8 | Inflammatory Bowel Disease 8 | 14.1 |
| NCSTN | Nicastrin | 14.09 |
| GPR35 | G Protein-Coupled Receptor 35 | 14.08 |
| FGF2 | Fibroblast Growth Factor 2 | 14.08 |
| ESR1 | Estrogen Receptor 1 | 14.07 |
| GDNF | Glial Cell Derived Neurotrophic Factor | 14.05 |
| CCL7 | C-C Motif Chemokine Ligand 7 | 14.03 |
| PLA2G4A | Phospholipase A2 Group IVA | 14.03 |
| ICOS | Inducible T Cell Costimulator | 14.01 |
| CCL18 | C-C Motif Chemokine Ligand 18 | 14.01 |
| MICA | MHC Class I Polypeptide-Related Sequence A | 14 |
| IBD6 | Inflammatory Bowel Disease 6 | 14 |
| AIF1L | Allograft Inflammatory Factor 1 Like | 13.95 |
| IL16 | Interleukin 16 | 13.95 |
| RET | Ret Proto-Oncogene | 13.94 |
| IDO1 | Indoleamine 2,3-Dioxygenase 1 | 13.94 |
| SYK | Spleen Associated Tyrosine Kinase | 13.89 |
| HGF | Hepatocyte Growth Factor | 13.88 |
| COPA | COPI Coat Complex Subunit Alpha | 13.86 |
| NR1H3 | Nuclear Receptor Subfamily 1 Group H Member 3 | 13.84 |
| CALCA | Calcitonin Related Polypeptide Alpha | 13.83 |
| FFAR4 | Free Fatty Acid Receptor 4 | 13.82 |
| IL27 | Interleukin 27 | 13.82 |
| NFKBIL1 | NFKB Inhibitor Like 1 | 13.81 |
| IFNGR1 | Interferon Gamma Receptor 1 | 13.8 |
| TAC1 | Tachykinin Precursor 1 | 13.77 |
| IL2RG | Interleukin 2 Receptor Subunit Gamma | 13.76 |
| GSDMD | Gasdermin D | 13.75 |
| RSPH4A | Radial Spoke Head Component 4A | 13.71 |
| RSPH9 | Radial Spoke Head Component 9 | 13.71 |
| PTGDR2 | Prostaglandin D2 Receptor 2 | 13.7 |
| UBE2L3 | Ubiquitin Conjugating Enzyme E2 L3 | 13.69 |
| NFE2L2 | Nuclear Factor, Erythroid 2 Like 2 | 13.67 |
| MIR222 | MicroRNA 222 | 13.66 |
| NFKB2 | Nuclear Factor Kappa B Subunit 2 | 13.66 |
| MIR132 | MicroRNA 132 | 13.66 |
| TFRC | Transferrin Receptor | 13.65 |
| TRAF6 | TNF Receptor Associated Factor 6 | 13.64 |
| KRT5 | Keratin 5 | 13.63 |
| GLUL | Glutamate-Ammonia Ligase | 13.63 |
| MIR34A | MicroRNA 34a | 13.58 |
| PSENEN | Presenilin Enhancer, Gamma-Secretase Subunit | 13.57 |
| IL12RB2 | Interleukin 12 Receptor Subunit Beta 2 | 13.57 |
| SOCS3 | Suppressor Of Cytokine Signaling 3 | 13.55 |
| IBD4 | Inflammatory Bowel Disease 4 | 13.53 |
| VDR | Vitamin D Receptor | 13.48 |
| ITGB4 | Integrin Subunit Beta 4 | 13.46 |
| IBD11 | Inflammatory Bowel Disease 11 | 13.46 |
| IBD12 | Inflammatory Bowel Disease 12 | 13.46 |
| IBD15 | Inflammatory Bowel Disease-15 | 13.46 |
| IBD16 | Inflammatory Bowel Disease-16 | 13.46 |
| IBD18 | Inflammatory Bowel Disease-18 | 13.46 |
| IBD20 | Inflammatory Bowel Disease-20 | 13.46 |
| IBD21 | Inflammatory Bowel Disease-21 | 13.46 |
| IBD22 | Inflammatory Bowel Disease-22 | 13.46 |
| IBD23 | Inflammatory Bowel Disease-23 | 13.46 |
| IBD24 | Inflammatory Bowel Disease-24 | 13.46 |
| IBD26 | Inflammatory Bowel Disease-26 | 13.46 |
| IBD27 | Inflammatory Bowel Disease-27 | 13.46 |
| NR1H4 | Nuclear Receptor Subfamily 1 Group H Member 4 | 13.42 |
| SERPINC1 | Serpin Family C Member 1 | 13.42 |
| GHRL | Ghrelin And Obestatin Prepropeptide | 13.41 |
| TRPV1 | Transient Receptor Potential Cation Channel Subfamily V Member 1 | 13.4 |
| HRH2 | Histamine Receptor H2 | 13.39 |
| IGF1 | Insulin Like Growth Factor 1 | 13.38 |
| CYP2C19 | Cytochrome P450 Family 2 Subfamily C Member 19 | 13.36 |
| NLRP6 | NLR Family Pyrin Domain Containing 6 | 13.35 |
| FN1 | Fibronectin 1 | 13.33 |
| PTGER4 | Prostaglandin E Receptor 4 | 13.32 |
| DSG1 | Desmoglein 1 | 13.31 |
| BPI | Bactericidal Permeability Increasing Protein | 13.3 |
| SFTPD | Surfactant Protein D | 13.29 |
| RNASEH2B | Ribonuclease H2 Subunit B | 13.29 |
| TNFRSF11B | TNF Receptor Superfamily Member 11b | 13.25 |
| COL7A1 | Collagen Type VII Alpha 1 Chain | 13.21 |
| ZNF750 | Zinc Finger Protein 750 | 13.21 |
| IFNA2 | Interferon Alpha 2 | 13.2 |
| MMP8 | Matrix Metallopeptidase 8 | 13.2 |
| GGT1 | Gamma-Glutamyltransferase 1 | 13.2 |
| MRAP | Melanocortin 2 Receptor Accessory Protein | 13.19 |
| ACKR2 | Atypical Chemokine Receptor 2 | 13.15 |
| ELN | Elastin | 13.15 |
| GJB2 | Gap Junction Protein Beta 2 | 13.14 |
| IL26 | Interleukin 26 | 13.13 |
| VWF | Von Willebrand Factor | 13.1 |
| CCR7 | C-C Motif Chemokine Receptor 7 | 13.07 |
| PRSS2 | Serine Protease 2 | 13.07 |
| CARD9 | Caspase Recruitment Domain Family Member 9 | 13.03 |
| CYBC1 | Cytochrome B-245 Chaperone 1 | 13.02 |
| RLBP1 | Retinaldehyde Binding Protein 1 | 13.02 |
| HIF1A | Hypoxia Inducible Factor 1 Subunit Alpha | 13.01 |
| C5 | Complement C5 | 12.98 |
| STAT6 | Signal Transducer And Activator Of Transcription 6 | 12.97 |
| DNAAF2 | Dynein Axonemal Assembly Factor 2 | 12.95 |
| IRAK4 | Interleukin 1 Receptor Associated Kinase 4 | 12.95 |
| NOX1 | NADPH Oxidase 1 | 12.95 |
| TARS1 | Threonyl-TRNA Synthetase 1 | 12.94 |
| KRT16 | Keratin 16 | 12.93 |
| CFI | Complement Factor I | 12.92 |
| ENG | Endoglin | 12.91 |
| KRT18 | Keratin 18 | 12.89 |
| SFTPA1 | Surfactant Protein A1 | 12.88 |
| LTC4S | Leukotriene C4 Synthase | 12.87 |
| RNF31 | Ring Finger Protein 31 | 12.87 |
| DDX58 | DExD/H-Box Helicase 58 | 12.86 |
| IL6R | Interleukin 6 Receptor | 12.85 |
| BLK | BLK Proto-Oncogene, Src Family Tyrosine Kinase | 12.82 |
| FGFR3 | Fibroblast Growth Factor Receptor 3 | 12.82 |
| TNFSF4 | TNF Superfamily Member 4 | 12.82 |
| REN | Renin | 12.79 |
| LMNA | Lamin A/C | 12.78 |
| C1R | Complement C1r | 12.77 |
| IL6ST | Interleukin 6 Signal Transducer | 12.76 |
| NR1H2 | Nuclear Receptor Subfamily 1 Group H Member 2 | 12.74 |
| ABCG2 | ATP Binding Cassette Subfamily G Member 2 (Junior Blood Group) | 12.74 |
| RNF213 | Ring Finger Protein 213 | 12.74 |
| MIR200C | MicroRNA 200c | 12.72 |
| RTEL1 | Regulator Of Telomere Elongation Helicase 1 | 12.72 |
| THBS1 | Thrombospondin 1 | 12.7 |
| KRT10 | Keratin 10 | 12.7 |
| COL17A1 | Collagen Type XVII Alpha 1 Chain | 12.66 |
| SLCO2A1 | Solute Carrier Organic Anion Transporter Family Member 2A1 | 12.65 |
| FPR2 | Formyl Peptide Receptor 2 | 12.58 |
| TACR1 | Tachykinin Receptor 1 | 12.53 |
| SCT | Secretin | 12.52 |
| PLEC | Plectin | 12.49 |
| IL18RAP | Interleukin 18 Receptor Accessory Protein | 12.49 |
| WIPF1 | WAS/WASL Interacting Protein Family Member 1 | 12.48 |
| ABCB11 | ATP Binding Cassette Subfamily B Member 11 | 12.46 |
| CD274 | CD274 Molecule | 12.45 |
| VTN | Vitronectin | 12.42 |
| CCR4 | C-C Motif Chemokine Receptor 4 | 12.37 |
| PLA2G6 | Phospholipase A2 Group VI | 12.34 |
| PKP1 | Plakophilin 1 | 12.33 |
| TLR8 | Toll Like Receptor 8 | 12.32 |
| RSPH1 | Radial Spoke Head Component 1 | 12.31 |
| CTRC | Chymotrypsin C | 12.31 |
| SNCA | Synuclein Alpha | 12.25 |
| RNASEH2A | Ribonuclease H2 Subunit A | 12.24 |
| RNASEH2C | Ribonuclease H2 Subunit C | 12.24 |
| CD81 | CD81 Molecule | 12.24 |
| SLC22A5 | Solute Carrier Family 22 Member 5 | 12.24 |
| BTK | Bruton Tyrosine Kinase | 12.23 |
| RNF125 | Ring Finger Protein 125 | 12.19 |
| HDAC4 | Histone Deacetylase 4 | 12.19 |
| HLA-DRA | Major Histocompatibility Complex, Class II, DR Alpha | 12.19 |
| IRF3 | Interferon Regulatory Factor 3 | 12.18 |
| HMGCR | 3-Hydroxy-3-Methylglutaryl-CoA Reductase | 12.17 |
| MBP | Myelin Basic Protein | 12.15 |
| MIR221 | MicroRNA 221 | 12.14 |
| TRIM21 | Tripartite Motif Containing 21 | 12.14 |
| PIK3R1 | Phosphoinositide-3-Kinase Regulatory Subunit 1 | 12.11 |
| MMP12 | Matrix Metallopeptidase 12 | 12.1 |
| CHST8 | Carbohydrate Sulfotransferase 8 | 12.08 |
| CD69 | CD69 Molecule | 12.07 |
| FLNC | Filamin C | 12.07 |
| TF | Transferrin | 12.06 |
| MTHFR | Methylenetetrahydrofolate Reductase | 12.02 |
| PECAM1 | Platelet And Endothelial Cell Adhesion Molecule 1 | 12.01 |
| MIR15B | MicroRNA 15b | 12 |
| REL | REL Proto-Oncogene, NF-KB Subunit | 12 |
| OSM | Oncostatin M | 12 |
| BCL2 | BCL2 Apoptosis Regulator | 11.99 |
| PLAU | Plasminogen Activator, Urokinase | 11.98 |
| ALOX12 | Arachidonate 12-Lipoxygenase, 12S Type | 11.96 |
| SST | Somatostatin | 11.91 |
| TLR10 | Toll Like Receptor 10 | 11.91 |
| TGM2 | Transglutaminase 2 | 11.91 |
| IKZF1 | IKAROS Family Zinc Finger 1 | 11.91 |
| CCN6 | Cellular Communication Network Factor 6 | 11.91 |
| TICAM1 | Toll Like Receptor Adaptor Molecule 1 | 11.87 |
| MME | Membrane Metalloendopeptidase | 11.86 |
| MMP13 | Matrix Metallopeptidase 13 | 11.84 |
| CCL1 | C-C Motif Chemokine Ligand 1 | 11.84 |
| H2AC18 | H2A Clustered Histone 18 | 11.83 |
| MYC | MYC Proto-Oncogene, BHLH Transcription Factor | 11.82 |
| ACTA1 | Actin Alpha 1, Skeletal Muscle | 11.8 |
| AQP4 | Aquaporin 4 | 11.79 |
| EDN1 | Endothelin 1 | 11.77 |
| DNAI2 | Dynein Axonemal Intermediate Chain 2 | 11.77 |
| SQSTM1 | Sequestosome 1 | 11.77 |
| CCND1 | Cyclin D1 | 11.77 |
| CCL26 | C-C Motif Chemokine Ligand 26 | 11.76 |
| MIR31 | MicroRNA 31 | 11.75 |
| MUC5AC | Mucin 5AC, Oligomeric Mucus/Gel-Forming | 11.75 |
| ENO1 | Enolase 1 | 11.73 |
| TPM3 | Tropomyosin 3 | 11.73 |
| TERC | Telomerase RNA Component | 11.72 |
| RIPK2 | Receptor Interacting Serine/Threonine Kinase 2 | 11.72 |
| DUOX2 | Dual Oxidase 2 | 11.7 |
| CXCR1 | C-X-C Motif Chemokine Receptor 1 | 11.68 |
| HYDIN | HYDIN Axonemal Central Pair Apparatus Protein | 11.67 |
| CXCL13 | C-X-C Motif Chemokine Ligand 13 | 11.67 |
| VIP | Vasoactive Intestinal Peptide | 11.65 |
| TP63 | Tumor Protein P63 | 11.64 |
| MB | Myoglobin | 11.64 |
| MT-ND1 | Mitochondrially Encoded NADH:Ubiquinone Oxidoreductase Core Subunit 1 | 11.62 |
| MS4A2 | Membrane Spanning 4-Domains A2 | 11.61 |
| NME8 | NME/NM23 Family Member 8 | 11.6 |
| CCDC40 | Coiled-Coil Domain Containing 40 | 11.6 |
| DRC1 | Dynein Regulatory Complex Subunit 1 | 11.6 |
| COL2A1 | Collagen Type II Alpha 1 Chain | 11.6 |
| ALOX15 | Arachidonate 15-Lipoxygenase | 11.55 |
| GNAS | GNAS Complex Locus | 11.53 |
| CCL13 | C-C Motif Chemokine Ligand 13 | 11.53 |
| MIR223 | MicroRNA 223 | 11.52 |
| PMM2 | Phosphomannomutase 2 | 11.51 |
| CX3CR1 | C-X3-C Motif Chemokine Receptor 1 | 11.51 |
| GJB6 | Gap Junction Protein Beta 6 | 11.47 |
| MICB | MHC Class I Polypeptide-Related Sequence B | 11.45 |
| PRF1 | Perforin 1 | 11.44 |
| C5AR1 | Complement C5a Receptor 1 | 11.44 |
| PTGES | Prostaglandin E Synthase | 11.4 |
| NPPB | Natriuretic Peptide B | 11.37 |
| MIR20A | MicroRNA 20a | 11.33 |
| WG | Wegener Granulomatosis | 11.31 |
| POMP | Proteasome Maturation Protein | 11.3 |
| CYSLTR1 | Cysteinyl Leukotriene Receptor 1 | 11.29 |
| ADM | Adrenomedullin | 11.29 |
| CPT2 | Carnitine Palmitoyltransferase 2 | 11.26 |
| CSF1R | Colony Stimulating Factor 1 Receptor | 11.24 |
| F2R | Coagulation Factor II Thrombin Receptor | 11.24 |
| LAMC2 | Laminin Subunit Gamma 2 | 11.21 |
| CCL8 | C-C Motif Chemokine Ligand 8 | 11.21 |
| AGT | Angiotensinogen | 11.21 |
| PON1 | Paraoxonase 1 | 11.2 |
| MET | MET Proto-Oncogene, Receptor Tyrosine Kinase | 11.19 |
| LBP | Lipopolysaccharide Binding Protein | 11.18 |
| NTRK1 | Neurotrophic Receptor Tyrosine Kinase 1 | 11.17 |
| RAC1 | Rac Family Small GTPase 1 | 11.16 |
| CCR8 | C-C Motif Chemokine Receptor 8 | 11.15 |
| HSPA4 | Heat Shock Protein Family A (Hsp70) Member 4 | 11.13 |
| JAK3 | Janus Kinase 3 | 11.12 |
| HPS1 | HPS1 Biogenesis Of Lysosomal Organelles Complex 3 Subunit 1 | 11.12 |
| CHGA | Chromogranin A | 11.12 |
| MX1 | MX Dynamin Like GTPase 1 | 11.1 |
| TNFRSF11A | TNF Receptor Superfamily Member 11a | 11.1 |
| DNAAF1 | Dynein Axonemal Assembly Factor 1 | 11.09 |
| LTB4R | Leukotriene B4 Receptor | 11.09 |
| IL21R | Interleukin 21 Receptor | 11.09 |
| GJA1 | Gap Junction Protein Alpha 1 | 11.08 |
| AREG | Amphiregulin | 11.08 |
| DLG5 | Discs Large MAGUK Scaffold Protein 5 | 11.07 |
| ABCA3 | ATP Binding Cassette Subfamily A Member 3 | 11.05 |
| C1QA | Complement C1q A Chain | 11.05 |
| AHR | Aryl Hydrocarbon Receptor | 11.05 |
| SELPLG | Selectin P Ligand | 11.03 |
| AP1S3 | Adaptor Related Protein Complex 1 Subunit Sigma 3 | 11.03 |
| MLH1 | MutL Homolog 1 | 10.99 |
| SCN9A | Sodium Voltage-Gated Channel Alpha Subunit 9 | 10.97 |
| DNAI1 | Dynein Axonemal Intermediate Chain 1 | 10.96 |
| CCDC103 | Coiled-Coil Domain Containing 103 | 10.96 |
| ITGA6 | Integrin Subunit Alpha 6 | 10.95 |
| CD247 | CD247 Molecule | 10.94 |
| PIK3C2A | Phosphatidylinositol-4-Phosphate 3-Kinase Catalytic Subunit Type 2 Alpha | 10.92 |
| JAK1 | Janus Kinase 1 | 10.91 |
| MAPT | Microtubule Associated Protein Tau | 10.9 |
| A2ML1 | Alpha-2-Macroglobulin Like 1 | 10.9 |
| RARRES2 | Retinoic Acid Receptor Responder 2 | 10.89 |
| AVP | Arginine Vasopressin | 10.88 |
| KEAP1 | Kelch Like ECH Associated Protein 1 | 10.87 |
| DNAH5 | Dynein Axonemal Heavy Chain 5 | 10.87 |
| DNAAF5 | Dynein Axonemal Assembly Factor 5 | 10.87 |
| MIR142 | MicroRNA 142 | 10.84 |
| MIR192 | MicroRNA 192 | 10.84 |
| IL1RL1 | Interleukin 1 Receptor Like 1 | 10.84 |
| GAST | Gastrin | 10.82 |
| MECP2 | Methyl-CpG Binding Protein 2 | 10.81 |
| DNAH11 | Dynein Axonemal Heavy Chain 11 | 10.8 |
| CCDC114 | Coiled-Coil Domain Containing 114 | 10.8 |
| DNAAF3 | Dynein Axonemal Assembly Factor 3 | 10.8 |
| CCDC39 | Coiled-Coil Domain Containing 39 | 10.8 |
| MCIDAS | Multiciliate Differentiation And DNA Synthesis Associated Cell Cycle Protein | 10.8 |
| NR1I2 | Nuclear Receptor Subfamily 1 Group I Member 2 | 10.79 |
| TGM1 | Transglutaminase 1 | 10.78 |
| COMP | Cartilage Oligomeric Matrix Protein | 10.77 |
| LBR | Lamin B Receptor | 10.76 |
| TNFRSF4 | TNF Receptor Superfamily Member 4 | 10.75 |
| BMP6 | Bone Morphogenetic Protein 6 | 10.75 |
| SOD1 | Superoxide Dismutase 1 | 10.74 |
| LIF | LIF Interleukin 6 Family Cytokine | 10.74 |
| ITGAX | Integrin Subunit Alpha X | 10.73 |
| CCN2 | Cellular Communication Network Factor 2 | 10.73 |
| SOCS1 | Suppressor Of Cytokine Signaling 1 | 10.73 |
| PSMB4 | Proteasome 20S Subunit Beta 4 | 10.72 |
| SLC17A5 | Solute Carrier Family 17 Member 5 | 10.72 |
| SERPINB8 | Serpin Family B Member 8 | 10.72 |
| EPO | Erythropoietin | 10.71 |
| NKX2-3 | NK2 Homeobox 3 | 10.7 |
| PGM3 | Phosphoglucomutase 3 | 10.68 |
| TNFAIP6 | TNF Alpha Induced Protein 6 | 10.68 |
| LYST | Lysosomal Trafficking Regulator | 10.64 |
| MIR143 | MicroRNA 143 | 10.63 |
| EBI3 | Epstein-Barr Virus Induced 3 | 10.6 |
| IRF8 | Interferon Regulatory Factor 8 | 10.59 |
| GFAP | Glial Fibrillary Acidic Protein | 10.58 |
| CCL24 | C-C Motif Chemokine Ligand 24 | 10.56 |
| EGF | Epidermal Growth Factor | 10.55 |
| TNFRSF10A | TNF Receptor Superfamily Member 10a | 10.54 |
| GUSB | Glucuronidase Beta | 10.54 |
| IL36A | Interleukin 36 Alpha | 10.53 |
| S100B | S100 Calcium Binding Protein B | 10.5 |
| MSTN | Myostatin | 10.5 |
| MOG | Myelin Oligodendrocyte Glycoprotein | 10.47 |
| CCL27 | C-C Motif Chemokine Ligand 27 | 10.45 |
| ANO5 | Anoctamin 5 | 10.44 |
| SIRT1 | Sirtuin 1 | 10.43 |
| NOS1 | Nitric Oxide Synthase 1 | 10.42 |
| UNC93B1 | Unc-93 Homolog B1, TLR Signaling Regulator | 10.41 |
| APOL1 | Apolipoprotein L1 | 10.41 |
| SAA4 | Serum Amyloid A4, Constitutive | 10.41 |
| EGR1 | Early Growth Response 1 | 10.4 |
| CRH | Corticotropin Releasing Hormone | 10.39 |
| FCGR1A | Fc Fragment Of IgG Receptor Ia | 10.38 |
| CALR | Calreticulin | 10.37 |
| IL1RL2 | Interleukin 1 Receptor Like 2 | 10.37 |
| HFE | Homeostatic Iron Regulator | 10.35 |
| CD6 | CD6 Molecule | 10.35 |
| KRT1 | Keratin 1 | 10.32 |
| HRH1 | Histamine Receptor H1 | 10.32 |
| TYR | Tyrosinase | 10.3 |
| EDAR | Ectodysplasin A Receptor | 10.3 |
| SMAD7 | SMAD Family Member 7 | 10.29 |
| LAMB3 | Laminin Subunit Beta 3 | 10.28 |
| MIR148A | MicroRNA 148a | 10.28 |
| EDA | Ectodysplasin A | 10.23 |
| FCAR | Fc Fragment Of IgA Receptor | 10.23 |
| TIRAP | TIR Domain Containing Adaptor Protein | 10.22 |
| GCG | Glucagon | 10.21 |
| PGR | Progesterone Receptor | 10.2 |
| NAT2 | N-Acetyltransferase 2 | 10.2 |
| HTR1A | 5-Hydroxytryptamine Receptor 1A | 10.2 |
| ICAM3 | Intercellular Adhesion Molecule 3 | 10.19 |
| ACADVL | Acyl-CoA Dehydrogenase Very Long Chain | 10.19 |
| HSPG2 | Heparan Sulfate Proteoglycan 2 | 10.19 |
| REG3A | Regenerating Family Member 3 Alpha | 10.16 |
| KITLG | KIT Ligand | 10.16 |
| BTD | Biotinidase | 10.16 |
| MIR199A1 | MicroRNA 199a-1 | 10.14 |
| ZFP36 | ZFP36 Ring Finger Protein | 10.1 |
| SAG | S-Antigen Visual Arrestin | 10.1 |
| ATP12A | ATPase H+/K+ Transporting Non-Gastric Alpha2 Subunit | 10.1 |
| NOTCH3 | Notch Receptor 3 | 10.1 |
| HAMP | Hepcidin Antimicrobial Peptide | 10.09 |
| CDKN1A | Cyclin Dependent Kinase Inhibitor 1A | 10.09 |
| ARMC4 | Armadillo Repeat Containing 4 | 10.09 |
| CPA1 | Carboxypeptidase A1 | 10.04 |
| FBN1 | Fibrillin 1 | 10.04 |
| PTH | Parathyroid Hormone | 10.03 |
| PPBP | Pro-Platelet Basic Protein | 10.03 |
| NOS3 | Nitric Oxide Synthase 3 | 10.02 |
| KRT17 | Keratin 17 | 10.02 |
| CTSK | Cathepsin K | 10.02 |
| DNAH1 | Dynein Axonemal Heavy Chain 1 | 10.01 |
| AGTR1 | Angiotensin II Receptor Type 1 | 10.01 |
| RBP4 | Retinol Binding Protein 4 | 9.99 |
| RBP3 | Retinol Binding Protein 3 | 9.99 |
| TIMP2 | TIMP Metallopeptidase Inhibitor 2 | 9.99 |
| DOCK8 | Dedicator Of Cytokinesis 8 | 9.98 |
| MIR125A | MicroRNA 125a | 9.97 |
| CYP2C8 | Cytochrome P450 Family 2 Subfamily C Member 8 | 9.95 |
| MADCAM1 | Mucosal Vascular Addressin Cell Adhesion Molecule 1 | 9.94 |
| TG | Thyroglobulin | 9.93 |
| FGF23 | Fibroblast Growth Factor 23 | 9.9 |
| TRAF3 | TNF Receptor Associated Factor 3 | 9.89 |
| MYLK | Myosin Light Chain Kinase | 9.89 |
| CLCNKB | Chloride Voltage-Gated Channel Kb | 9.86 |
| ANXA5 | Annexin A5 | 9.85 |
| NPSR1 | Neuropeptide S Receptor 1 | 9.85 |
| GAPDH | Glyceraldehyde-3-Phosphate Dehydrogenase | 9.85 |
| SOD2 | Superoxide Dismutase 2 | 9.85 |
| CCNO | Cyclin O | 9.84 |
| DNAH9 | Dynein Axonemal Heavy Chain 9 | 9.84 |
| SPAG1 | Sperm Associated Antigen 1 | 9.84 |
| ZMYND10 | Zinc Finger MYND-Type Containing 10 | 9.84 |
| LRRC6 | Leucine Rich Repeat Containing 6 | 9.84 |
| CCDC151 | Coiled-Coil Domain Containing 151 | 9.84 |
| RSPH3 | Radial Spoke Head 3 | 9.84 |
| CFAP298 | Cilia And Flagella Associated Protein 298 | 9.84 |
| SAMD9 | Sterile Alpha Motif Domain Containing 9 | 9.84 |
| LAMA3 | Laminin Subunit Alpha 3 | 9.84 |
| BIRC3 | Baculoviral IAP Repeat Containing 3 | 9.84 |
| ERBB2 | Erb-B2 Receptor Tyrosine Kinase 2 | 9.83 |
| IL25 | Interleukin 25 | 9.83 |
| BANK1 | B Cell Scaffold Protein With Ankyrin Repeats 1 | 9.82 |
| NCAM1 | Neural Cell Adhesion Molecule 1 | 9.81 |
| SCN11A | Sodium Voltage-Gated Channel Alpha Subunit 11 | 9.8 |
| CEBPB | CCAAT Enhancer Binding Protein Beta | 9.79 |
| FGF10 | Fibroblast Growth Factor 10 | 9.78 |
| TYK2 | Tyrosine Kinase 2 | 9.78 |
| USB1 | U6 SnRNA Biogenesis Phosphodiesterase 1 | 9.78 |
| CARS1 | Cysteinyl-TRNA Synthetase 1 | 9.78 |
| LGALS1 | Galectin 1 | 9.77 |
| LAMA2 | Laminin Subunit Alpha 2 | 9.76 |
| TAP2 | Transporter 2, ATP Binding Cassette Subfamily B Member | 9.76 |
| DPP4 | Dipeptidyl Peptidase 4 | 9.75 |
| RELN | Reelin | 9.75 |
| LRP1 | LDL Receptor Related Protein 1 | 9.75 |
| AIM2 | Absent In Melanoma 2 | 9.74 |
| RELB | RELB Proto-Oncogene, NF-KB Subunit | 9.73 |
| TJP1 | Tight Junction Protein 1 | 9.72 |
| CLDN2 | Claudin 2 | 9.69 |
| NLRP7 | NLR Family Pyrin Domain Containing 7 | 9.67 |
| PPARD | Peroxisome Proliferator Activated Receptor Delta | 9.67 |
| CFHR2 | Complement Factor H Related 2 | 9.66 |
| DSP | Desmoplakin | 9.66 |
| TAP1 | Transporter 1, ATP Binding Cassette Subfamily B Member | 9.66 |
| ADGRE3 | Adhesion G Protein-Coupled Receptor E3 | 9.66 |
| CCL21 | C-C Motif Chemokine Ligand 21 | 9.66 |
| VIM | Vimentin | 9.66 |
| HSP90AA1 | Heat Shock Protein 90 Alpha Family Class A Member 1 | 9.65 |
| TPO | Thyroid Peroxidase | 9.64 |
| MTOR | Mechanistic Target Of Rapamycin Kinase | 9.64 |
| CD68 | CD68 Molecule | 9.64 |
| GNA11 | G Protein Subunit Alpha 11 | 9.64 |
| FGF7 | Fibroblast Growth Factor 7 | 9.64 |
| PSORS1C1 | Psoriasis Susceptibility 1 Candidate 1 | 9.63 |
| ATP4A | ATPase H+/K+ Transporting Subunit Alpha | 9.62 |
| MIR17 | MicroRNA 17 | 9.62 |
| ODC1 | Ornithine Decarboxylase 1 | 9.6 |
| CYP19A1 | Cytochrome P450 Family 19 Subfamily A Member 1 | 9.6 |
| COL3A1 | Collagen Type III Alpha 1 Chain | 9.59 |
| SHBG | Sex Hormone Binding Globulin | 9.58 |
| ITK | IL2 Inducible T Cell Kinase | 9.58 |
| FAM13A | Family With Sequence Similarity 13 Member A | 9.57 |
| TRH | Thyrotropin Releasing Hormone | 9.55 |
| SRC | SRC Proto-Oncogene, Non-Receptor Tyrosine Kinase | 9.55 |
| RORC | RAR Related Orphan Receptor C | 9.54 |
| NR1D1 | Nuclear Receptor Subfamily 1 Group D Member 1 | 9.52 |
| HAVCR1 | Hepatitis A Virus Cellular Receptor 1 | 9.51 |
| FCER2 | Fc Fragment Of IgE Receptor II | 9.51 |
| DDX41 | DEAD-Box Helicase 41 | 9.51 |
| HPRT1 | Hypoxanthine Phosphoribosyltransferase 1 | 9.51 |
| MIR93 | MicroRNA 93 | 9.49 |
| HCRT | Hypocretin Neuropeptide Precursor | 9.48 |
| ACTC1 | Actin Alpha Cardiac Muscle 1 | 9.48 |
| BRAF | B-Raf Proto-Oncogene, Serine/Threonine Kinase | 9.47 |
| DEFB1 | Defensin Beta 1 | 9.47 |
| SERPINA6 | Serpin Family A Member 6 | 9.46 |
| POU2AF1 | POU Class 2 Homeobox Associating Factor 1 | 9.46 |
| PTEN | Phosphatase And Tensin Homolog | 9.45 |
| PLA2G10 | Phospholipase A2 Group X | 9.45 |
| LTA4H | Leukotriene A4 Hydrolase | 9.44 |
| CCK | Cholecystokinin | 9.43 |
| MAF | MAF BZIP Transcription Factor | 9.43 |
| HSD11B1 | Hydroxysteroid 11-Beta Dehydrogenase 1 | 9.43 |
| BRCA2 | BRCA2 DNA Repair Associated | 9.41 |
| P2RX7 | Purinergic Receptor P2X 7 | 9.4 |
| REG4 | Regenerating Family Member 4 | 9.4 |
| CHKA | Choline Kinase Alpha | 9.39 |
| MALAT1 | Metastasis Associated Lung Adenocarcinoma Transcript 1 | 9.37 |
| MIR141 | MicroRNA 141 | 9.37 |
| AP3B1 | Adaptor Related Protein Complex 3 Subunit Beta 1 | 9.37 |
| SMAD2 | SMAD Family Member 2 | 9.37 |
| MFSD10 | Major Facilitator Superfamily Domain Containing 10 | 9.35 |
| BCL6 | BCL6 Transcription Repressor | 9.33 |
| ARG1 | Arginase 1 | 9.32 |
| PDGFRB | Platelet Derived Growth Factor Receptor Beta | 9.32 |
| AFP | Alpha Fetoprotein | 9.31 |
| MYH11 | Myosin Heavy Chain 11 | 9.31 |
| KRT8 | Keratin 8 | 9.3 |
| PI3 | Peptidase Inhibitor 3 | 9.3 |
| ATP8B1 | ATPase Phospholipid Transporting 8B1 | 9.3 |
| IL32 | Interleukin 32 | 9.28 |
| GRP | Gastrin Releasing Peptide | 9.27 |
| IL5RA | Interleukin 5 Receptor Subunit Alpha | 9.26 |
| SHARPIN | SHANK Associated RH Domain Interactor | 9.25 |
| CTSC | Cathepsin C | 9.25 |
| SKIV2L | Ski2 Like RNA Helicase | 9.25 |
| SMAD4 | SMAD Family Member 4 | 9.24 |
| CD59 | CD59 Molecule (CD59 Blood Group) | 9.21 |
| CYP1B1 | Cytochrome P450 Family 1 Subfamily B Member 1 | 9.19 |
| EPRS1 | Glutamyl-Prolyl-TRNA Synthetase 1 | 9.19 |
| CR1 | Complement C3b/C4b Receptor 1 (Knops Blood Group) | 9.18 |
| KLRK1 | Killer Cell Lectin Like Receptor K1 | 9.16 |
| CCR9 | C-C Motif Chemokine Receptor 9 | 9.15 |
| CXCL11 | C-X-C Motif Chemokine Ligand 11 | 9.15 |
| ECM1 | Extracellular Matrix Protein 1 | 9.15 |
| CYP7A1 | Cytochrome P450 Family 7 Subfamily A Member 1 | 9.15 |
| LRRK2 | Leucine Rich Repeat Kinase 2 | 9.15 |
| CFH | Complement Factor H | 9.14 |
| IL17RC | Interleukin 17 Receptor C | 9.14 |
| LACTB | Lactamase Beta | 9.13 |
| JAZF1 | JAZF Zinc Finger 1 | 9.12 |
| UMOD | Uromodulin | 9.11 |
| TNFRSF18 | TNF Receptor Superfamily Member 18 | 9.11 |
| SCNN1A | Sodium Channel Epithelial 1 Subunit Alpha | 9.08 |
| COMT | Catechol-O-Methyltransferase | 9.07 |
| CXCL6 | C-X-C Motif Chemokine Ligand 6 | 9.07 |
| IGSF6 | Immunoglobulin Superfamily Member 6 | 9.06 |
| IFNGR2 | Interferon Gamma Receptor 2 | 9.06 |
| ABCC1 | ATP Binding Cassette Subfamily C Member 1 | 9.06 |
| GFI1 | Growth Factor Independent 1 Transcriptional Repressor | 9.06 |
| PRMT7 | Protein Arginine Methyltransferase 7 | 9.06 |
| GNRH1 | Gonadotropin Releasing Hormone 1 | 9.05 |
| VCP | Valosin Containing Protein | 9.05 |
| IFNAR1 | Interferon Alpha And Beta Receptor Subunit 1 | 9.03 |
| KRT19 | Keratin 19 | 9.02 |
| DPYD | Dihydropyrimidine Dehydrogenase | 9.02 |
| KIAA0319L | KIAA0319 Like | 9.02 |
| PXK | PX Domain Containing Serine/Threonine Kinase Like | 9.02 |
| CELIAC2 | Celiac Disease 2 | 9.02 |
| SLEB3 | Systemic Lupus Erythematosus Susceptibility 3 | 9.02 |
| CELIAC10 | Celiac Disease, Susceptibility To, 10 | 9.02 |
| CELIAC11 | Celiac Disease, Susceptibility To, 11 | 9.02 |
| CELIAC12 | Celiac Disease, Susceptibility To, 12 | 9.02 |
| CELIAC13 | Celiac Disease, Susceptibility To, 13 | 9.02 |
| CELIAC5 | Celiac Disease, Susceptibility To, 5 | 9.02 |
| CELIAC6 | Celiac Disease, Susceptibility To, 6 | 9.02 |
| CELIAC7 | Celiac Disease, Susceptibility To, 7 | 9.02 |
| CELIAC8 | Celiac Disease, Susceptibility To, 8 | 9.02 |
| CELIAC9 | Celiac Disease, Susceptibility To, 9 | 9.02 |
| SLEB12 | Systemic Lupus Erythematosus, Susceptibility To, 12 | 9.02 |
| SLEB13 | Systemic Lupus Erythematosus, Susceptibility To, 13 | 9.02 |
| SLEB14 | Systemic Lupus Erythematosus, Susceptiblity To, 14 | 9.02 |
| SLEB15 | Systemic Lupus Erthematosus, Susceptibility To, 15 | 9.02 |
| SLEB4 | Systemic Lupus Erythematosus, Susceptibility To, 4 | 9.02 |
| SLEB5 | Systemic Lupus Erythematosus, Susceptibility To, 5 | 9.02 |
| SLEB7 | Systemic Lupus Erythematosus, Susceptibility To, 7 | 9.02 |
| SLEB8 | Systemic Lupus Erythematosus, Susceptibility To, 8 | 9.02 |
| BCL2A1 | BCL2 Related Protein A1 | 9.02 |
| BAP1 | BRCA1 Associated Protein 1 | 9.02 |
| IL18BP | Interleukin 18 Binding Protein | 9.01 |
| SULT1A3 | Sulfotransferase Family 1A Member 3 | 9.01 |
| TAPBP | TAP Binding Protein | 9.01 |
| TPM4 | Tropomyosin 4 | 8.98 |
| MUC2 | Mucin 2, Oligomeric Mucus/Gel-Forming | 8.97 |
| AQP2 | Aquaporin 2 | 8.96 |
| HRAS | HRas Proto-Oncogene, GTPase | 8.96 |
| AMBP | Alpha-1-Microglobulin/Bikunin Precursor | 8.95 |
| LGALS3 | Galectin 3 | 8.94 |
| FLT1 | Fms Related Receptor Tyrosine Kinase 1 | 8.94 |
| HNF1B | HNF1 Homeobox B | 8.93 |
| MTM1 | Myotubularin 1 | 8.93 |
| GSTM1 | Glutathione S-Transferase Mu 1 | 8.92 |
| MSN | Moesin | 8.92 |
| IVL | Involucrin | 8.91 |
| CD46 | CD46 Molecule | 8.9 |
| FGA | Fibrinogen Alpha Chain | 8.9 |
| FLT4 | Fms Related Receptor Tyrosine Kinase 4 | 8.89 |
| ACVR1 | Activin A Receptor Type 1 | 8.87 |
| PRG2 | Proteoglycan 2, Pro Eosinophil Major Basic Protein | 8.86 |
| HNMT | Histamine N-Methyltransferase | 8.85 |
| CYP3A4 | Cytochrome P450 Family 3 Subfamily A Member 4 | 8.83 |
| DES | Desmin | 8.83 |
| HSD3B7 | Hydroxy-Delta-5-Steroid Dehydrogenase, 3 Beta- And Steroid Delta-Isomerase 7 | 8.8 |
| TCIRG1 | T Cell Immune Regulator 1, ATPase H+ Transporting V0 Subunit A3 | 8.8 |
| COL5A1 | Collagen Type V Alpha 1 Chain | 8.79 |
| ALOX5AP | Arachidonate 5-Lipoxygenase Activating Protein | 8.79 |
| PF4 | Platelet Factor 4 | 8.78 |
| MLX | MAX Dimerization Protein MLX | 8.77 |
| NLRP10 | NLR Family Pyrin Domain Containing 10 | 8.77 |
| LPCAT2 | Lysophosphatidylcholine Acyltransferase 2 | 8.76 |
| GAS8 | Growth Arrest Specific 8 | 8.76 |
| TTC25 | Tetratricopeptide Repeat Domain 25 | 8.76 |
| DNAAF4 | Dynein Axonemal Assembly Factor 4 | 8.76 |
| KDR | Kinase Insert Domain Receptor | 8.76 |
| CD34 | CD34 Molecule | 8.75 |
| CST3 | Cystatin C | 8.75 |
| CFB | Complement Factor B | 8.74 |
| DMBT1 | Deleted In Malignant Brain Tumors 1 | 8.73 |
| ACAN | Aggrecan | 8.71 |
| NEK9 | NIMA Related Kinase 9 | 8.71 |
| PROCR | Protein C Receptor | 8.69 |
| ORMDL3 | ORMDL Sphingolipid Biosynthesis Regulator 3 | 8.68 |
| ESR2 | Estrogen Receptor 2 | 8.67 |
| CXCR5 | C-X-C Motif Chemokine Receptor 5 | 8.67 |
| MUC16 | Mucin 16, Cell Surface Associated | 8.67 |
| CLC | Charcot-Leyden Crystal Galectin | 8.67 |
| MAPK3 | Mitogen-Activated Protein Kinase 3 | 8.67 |
| CRLF1 | Cytokine Receptor Like Factor 1 | 8.66 |
| STUB1 | STIP1 Homology And U-Box Containing Protein 1 | 8.65 |
| AOC3 | Amine Oxidase Copper Containing 3 | 8.64 |
| PLAT | Plasminogen Activator, Tissue Type | 8.62 |
| STAT5B | Signal Transducer And Activator Of Transcription 5B | 8.62 |
| IL1R2 | Interleukin 1 Receptor Type 2 | 8.61 |
| CCDC65 | Coiled-Coil Domain Containing 65 | 8.6 |
| LRRC56 | Leucine Rich Repeat Containing 56 | 8.6 |
| DNAJB13 | DnaJ Heat Shock Protein Family (Hsp40) Member B13 | 8.6 |
| GAS2L2 | Growth Arrest Specific 2 Like 2 | 8.6 |
| DNAAF6 | Dynein Axonemal Assembly Factor 6 | 8.6 |
| CFAP300 | Cilia And Flagella Associated Protein 300 | 8.6 |
| PRL | Prolactin | 8.59 |
| FGF1 | Fibroblast Growth Factor 1 | 8.59 |
| POLG | DNA Polymerase Gamma, Catalytic Subunit | 8.59 |
| MROS | Melkersson-Rosenthal Syndrome | 8.58 |
| ENDO1 | Endometriosis, Susceptibility To, 1 | 8.58 |
| BCL2L1 | BCL2 Like 1 | 8.58 |
| G6PD | Glucose-6-Phosphate Dehydrogenase | 8.58 |
| CYCS | Cytochrome C, Somatic | 8.57 |

Supplementary table 4. First 1000 targets predicted to be relevant to virus or anti-virus.

| Gene Symbol | Description | Relevance Score |
| --- | --- | --- |
| STAT1 | Signal Transducer And Activator Of Transcription 1 | 81.07 |
| CCR5 | C-C Motif Chemokine Receptor 5 | 68.66 |
| IFNG | Interferon Gamma | 61.83 |
| IL6 | Interleukin 6 | 60.85 |
| CD209 | CD209 Molecule | 59.26 |
| TLR3 | Toll Like Receptor 3 | 56.6 |
| IL10 | Interleukin 10 | 56.14 |
| CD4 | CD4 Molecule | 50.96 |
| TNF | Tumor Necrosis Factor | 45.64 |
| TP53 | Tumor Protein P53 | 44.89 |
| DDX58 | DExD/H-Box Helicase 58 | 43.93 |
| IFNA1 | Interferon Alpha 1 | 43.79 |
| IFITM3 | Interferon Induced Transmembrane Protein 3 | 41.31 |
| CCL3 | C-C Motif Chemokine Ligand 3 | 41.04 |
| CASP8 | Caspase 8 | 40.86 |
| MAGT1 | Magnesium Transporter 1 | 40.45 |
| HLA-DRB1 | Major Histocompatibility Complex, Class II, DR Beta 1 | 40.25 |
| TBK1 | TANK Binding Kinase 1 | 40.09 |
| CCL2 | C-C Motif Chemokine Ligand 2 | 39.4 |
| BST2 | Bone Marrow Stromal Cell Antigen 2 | 37.89 |
| MAVS | Mitochondrial Antiviral Signaling Protein | 37.51 |
| MX1 | MX Dynamin Like GTPase 1 | 36.93 |
| CD8A | CD8a Molecule | 35.83 |
| IRF9 | Interferon Regulatory Factor 9 | 35.73 |
| IFNB1 | Interferon Beta 1 | 35.33 |
| IRF3 | Interferon Regulatory Factor 3 | 34.96 |
| EIF2AK2 | Eukaryotic Translation Initiation Factor 2 Alpha Kinase 2 | 34.95 |
| CD40LG | CD40 Ligand | 34.54 |
| IVNS1ABP | Influenza Virus NS1A Binding Protein | 33.69 |
| PIK3CA | Phosphatidylinositol-4,5-Bisphosphate 3-Kinase Catalytic Subunit Alpha | 33.64 |
| CCL5 | C-C Motif Chemokine Ligand 5 | 33.08 |
| CXCL12 | C-X-C Motif Chemokine Ligand 12 | 33.01 |
| IL2 | Interleukin 2 | 32.85 |
| DDX3X | DEAD-Box Helicase 3 X-Linked | 32.24 |
| SH2D1A | SH2 Domain Containing 1A | 32.06 |
| IFIH1 | Interferon Induced With Helicase C Domain 1 | 32.06 |
| IL2RA | Interleukin 2 Receptor Subunit Alpha | 31.65 |
| MYC | MYC Proto-Oncogene, BHLH Transcription Factor | 31.12 |
| IFNL3 | Interferon Lambda 3 | 30.98 |
| IRF7 | Interferon Regulatory Factor 7 | 30.94 |
| XIAP | X-Linked Inhibitor Of Apoptosis | 30.68 |
| HAVCR1 | Hepatitis A Virus Cellular Receptor 1 | 30.63 |
| NFKBIA | NFKB Inhibitor Alpha | 30.16 |
| CXCR4 | C-X-C Motif Chemokine Receptor 4 | 29.91 |
| PDCD1 | Programmed Cell Death 1 | 29.56 |
| CLEC4M | C-Type Lectin Domain Family 4 Member M | 29.35 |
| STAT2 | Signal Transducer And Activator Of Transcription 2 | 29.23 |
| ADA | Adenosine Deaminase | 29.2 |
| HLA-B | Major Histocompatibility Complex, Class I, B | 28.75 |
| HLA-DQB1 | Major Histocompatibility Complex, Class II, DQ Beta 1 | 28.72 |
| RSAD2 | Radical S-Adenosyl Methionine Domain Containing 2 | 28.58 |
| HLA-A | Major Histocompatibility Complex, Class I, A | 28.54 |
| APOBEC3G | Apolipoprotein B MRNA Editing Enzyme Catalytic Subunit 3G | 28.47 |
| TRAF3 | TNF Receptor Associated Factor 3 | 28.34 |
| CR2 | Complement C3d Receptor 2 | 27.87 |
| CD46 | CD46 Molecule | 27.84 |
| ISG15 | ISG15 Ubiquitin Like Modifier | 27.59 |
| IL1B | Interleukin 1 Beta | 27.38 |
| ERVW-1 | Endogenous Retrovirus Group W Member 1, Envelope | 27.07 |
| CXCL8 | C-X-C Motif Chemokine Ligand 8 | 26.93 |
| CPT2 | Carnitine Palmitoyltransferase 2 | 26.73 |
| TICAM1 | Toll Like Receptor Adaptor Molecule 1 | 26.72 |
| HAVCR2 | Hepatitis A Virus Cellular Receptor 2 | 26.66 |
| IL18BP | Interleukin 18 Binding Protein | 26.63 |
| PTPN11 | Protein Tyrosine Phosphatase Non-Receptor Type 11 | 26.37 |
| CXCL10 | C-X-C Motif Chemokine Ligand 10 | 26.3 |
| NECTIN1 | Nectin Cell Adhesion Molecule 1 | 26.23 |
| FCGR3A | Fc Fragment Of IgG Receptor IIIa | 26.14 |
| MTOR | Mechanistic Target Of Rapamycin Kinase | 25.34 |
| PRF1 | Perforin 1 | 25.31 |
| IL4 | Interleukin 4 | 25.27 |
| ITK | IL2 Inducible T Cell Kinase | 25.26 |
| IFNAR2 | Interferon Alpha And Beta Receptor Subunit 2 | 25.18 |
| IFNA2 | Interferon Alpha 2 | 24.91 |
| FADD | Fas Associated Via Death Domain | 24.8 |
| CTNNB1 | Catenin Beta 1 | 24.79 |
| ICAM1 | Intercellular Adhesion Molecule 1 | 24.71 |
| JUN | Jun Proto-Oncogene, AP-1 Transcription Factor Subunit | 24.6 |
| TNFRSF14 | TNF Receptor Superfamily Member 14 | 24.55 |
| HLA-C | Major Histocompatibility Complex, Class I, C | 24.53 |
| CCND1 | Cyclin D1 | 24.43 |
| IL7R | Interleukin 7 Receptor | 24.27 |
| TLR2 | Toll Like Receptor 2 | 24.19 |
| MIR122 | MicroRNA 122 | 24.09 |
| PML | PML Nuclear Body Scaffold | 23.95 |
| IL4R | Interleukin 4 Receptor | 23.77 |
| NFKB1 | Nuclear Factor Kappa B Subunit 1 | 23.36 |
| ZC3HAV1 | Zinc Finger CCCH-Type Containing, Antiviral 1 | 23.32 |
| TYK2 | Tyrosine Kinase 2 | 23.11 |
| CCL4 | C-C Motif Chemokine Ligand 4 | 23 |
| IFITM1 | Interferon Induced Transmembrane Protein 1 | 22.97 |
| CD3D | CD3d Molecule | 22.76 |
| DOCK8 | Dedicator Of Cytokinesis 8 | 22.69 |
| RANBP2 | RAN Binding Protein 2 | 22.63 |
| RNASEL | Ribonuclease L | 22.55 |
| STAT3 | Signal Transducer And Activator Of Transcription 3 | 22.46 |
| GPT | Glutamic--Pyruvic Transaminase | 22.23 |
| OAS1 | 2'-5'-Oligoadenylate Synthetase 1 | 22.22 |
| HRAS | HRas Proto-Oncogene, GTPase | 22.17 |
| TRIM5 | Tripartite Motif Containing 5 | 21.59 |
| ACADM | Acyl-CoA Dehydrogenase Medium Chain | 21.58 |
| FAS | Fas Cell Surface Death Receptor | 21.56 |
| AKT1 | AKT Serine/Threonine Kinase 1 | 21.55 |
| SERPINA1 | Serpin Family A Member 1 | 21.51 |
| HADHA | Hydroxyacyl-CoA Dehydrogenase Trifunctional Multienzyme Complex Subunit Alpha | 21.41 |
| JAK3 | Janus Kinase 3 | 21.37 |
| KRAS | KRAS Proto-Oncogene, GTPase | 21.36 |
| TLR9 | Toll Like Receptor 9 | 21.31 |
| PIK3R1 | Phosphoinositide-3-Kinase Regulatory Subunit 1 | 21.28 |
| PTEN | Phosphatase And Tensin Homolog | 21.21 |
| IFITM2 | Interferon Induced Transmembrane Protein 2 | 21.12 |
| CHUK | Component Of Inhibitor Of Nuclear Factor Kappa B Kinase Complex | 21.12 |
| B2M | Beta-2-Microglobulin | 21.07 |
| CCR6 | C-C Motif Chemokine Receptor 6 | 21.03 |
| ADAR | Adenosine Deaminase RNA Specific | 20.99 |
| RAG1 | Recombination Activating 1 | 20.87 |
| CIITA | Class II Major Histocompatibility Complex Transactivator | 20.83 |
| CD81 | CD81 Molecule | 20.81 |
| CASP3 | Caspase 3 | 20.8 |
| CX3CR1 | C-X3-C Motif Chemokine Receptor 1 | 20.78 |
| ATM | ATM Serine/Threonine Kinase | 20.77 |
| SLC2A1 | Solute Carrier Family 2 Member 1 | 20.72 |
| MIR155 | MicroRNA 155 | 20.54 |
| RELA | RELA Proto-Oncogene, NF-KB Subunit | 20.46 |
| IFNAR1 | Interferon Alpha And Beta Receptor Subunit 1 | 20.42 |
| ACADVL | Acyl-CoA Dehydrogenase Very Long Chain | 20.2 |
| PTPRC | Protein Tyrosine Phosphatase Receptor Type C | 20.02 |
| RAG2 | Recombination Activating 2 | 19.98 |
| NECTIN2 | Nectin Cell Adhesion Molecule 2 | 19.96 |
| SRC | SRC Proto-Oncogene, Non-Receptor Tyrosine Kinase | 19.92 |
| RAF1 | Raf-1 Proto-Oncogene, Serine/Threonine Kinase | 19.91 |
| KRT8 | Keratin 8 | 19.9 |
| TLR4 | Toll Like Receptor 4 | 19.88 |
| SLAMF1 | Signaling Lymphocytic Activation Molecule Family Member 1 | 19.87 |
| NRAS | NRAS Proto-Oncogene, GTPase | 19.83 |
| RSF1 | Remodeling And Spacing Factor 1 | 19.74 |
| CDKN2A | Cyclin Dependent Kinase Inhibitor 2A | 19.71 |
| MMP1 | Matrix Metallopeptidase 1 | 19.71 |
| IL2RG | Interleukin 2 Receptor Subunit Gamma | 19.66 |
| ITIH4 | Inter-Alpha-Trypsin Inhibitor Heavy Chain 4 | 19.65 |
| ERBB2 | Erb-B2 Receptor Tyrosine Kinase 2 | 19.64 |
| EGFR | Epidermal Growth Factor Receptor | 19.58 |
| MYD88 | MYD88 Innate Immune Signal Transduction Adaptor | 19.56 |
| FOS | Fos Proto-Oncogene, AP-1 Transcription Factor Subunit | 19.54 |
| IRF1 | Interferon Regulatory Factor 1 | 19.52 |
| MIR21 | MicroRNA 21 | 19.49 |
| CRP | C-Reactive Protein | 19.45 |
| MAPK1 | Mitogen-Activated Protein Kinase 1 | 19.42 |
| ZAP70 | Zeta Chain Of T Cell Receptor Associated Protein Kinase 70 | 19.38 |
| HCFC1 | Host Cell Factor C1 | 19.31 |
| PIK3CD | Phosphatidylinositol-4,5-Bisphosphate 3-Kinase Catalytic Subunit Delta | 19.29 |
| CCL11 | C-C Motif Chemokine Ligand 11 | 19.29 |
| OAS3 | 2'-5'-Oligoadenylate Synthetase 3 | 19.24 |
| CNTN2 | Contactin 2 | 19.23 |
| TLR7 | Toll Like Receptor 7 | 19.15 |
| CLEC4G | C-Type Lectin Domain Family 4 Member G | 19.14 |
| CSF2 | Colony Stimulating Factor 2 | 19.09 |
| MX2 | MX Dynamin Like GTPase 2 | 19.06 |
| CXADR | CXADR Ig-Like Cell Adhesion Molecule | 19.05 |
| CREB1 | CAMP Responsive Element Binding Protein 1 | 19.03 |
| CLDN1 | Claudin 1 | 19.02 |
| HLA-G | Major Histocompatibility Complex, Class I, G | 18.94 |
| FURIN | Furin, Paired Basic Amino Acid Cleaving Enzyme | 18.91 |
| ETS1 | ETS Proto-Oncogene 1, Transcription Factor | 18.84 |
| LAMTOR5 | Late Endosomal/Lysosomal Adaptor, MAPK And MTOR Activator 5 | 18.81 |
| TERT | Telomerase Reverse Transcriptase | 18.78 |
| IKBKB | Inhibitor Of Nuclear Factor Kappa B Kinase Subunit Beta | 18.73 |
| JAK1 | Janus Kinase 1 | 18.67 |
| HADH | Hydroxyacyl-CoA Dehydrogenase | 18.64 |
| MAPK8 | Mitogen-Activated Protein Kinase 8 | 18.59 |
| CCR7 | C-C Motif Chemokine Receptor 7 | 18.53 |
| HLA-E | Major Histocompatibility Complex, Class I, E | 18.52 |
| SMAD4 | SMAD Family Member 4 | 18.48 |
| EIF2S1 | Eukaryotic Translation Initiation Factor 2 Subunit Alpha | 18.48 |
| CALR | Calreticulin | 18.46 |
| FASLG | Fas Ligand | 18.45 |
| UNC93B1 | Unc-93 Homolog B1, TLR Signaling Regulator | 18.45 |
| HFE | Homeostatic Iron Regulator | 18.42 |
| APOE | Apolipoprotein E | 18.39 |
| SLC20A1 | Solute Carrier Family 20 Member 1 | 18.39 |
| NPC1 | NPC Intracellular Cholesterol Transporter 1 | 18.38 |
| SPCS1 | Signal Peptidase Complex Subunit 1 | 18.35 |
| NEU1 | Neuraminidase 1 | 18.33 |
| IL18 | Interleukin 18 | 18.32 |
| ALB | Albumin | 18.31 |
| LYN | LYN Proto-Oncogene, Src Family Tyrosine Kinase | 18.29 |
| THPO | Thrombopoietin | 18.27 |
| DAG1 | Dystroglycan 1 | 18.26 |
| TAP1 | Transporter 1, ATP Binding Cassette Subfamily B Member | 18.25 |
| ITGB3 | Integrin Subunit Beta 3 | 18.19 |
| IFI27 | Interferon Alpha Inducible Protein 27 | 18.17 |
| SAMHD1 | SAM And HD Domain Containing Deoxynucleoside Triphosphate Triphosphohydrolase 1 | 18.17 |
| KIR3DL1 | Killer Cell Immunoglobulin Like Receptor, Three Ig Domains And Long Cytoplasmic Tail 1 | 18.12 |
| APC | APC Regulator Of WNT Signaling Pathway | 18.12 |
| SCARB1 | Scavenger Receptor Class B Member 1 | 18.05 |
| KIT | KIT Proto-Oncogene, Receptor Tyrosine Kinase | 18.05 |
| EBI3 | Epstein-Barr Virus Induced 3 | 18.02 |
| GATA2 | GATA Binding Protein 2 | 18.01 |
| STING1 | Stimulator Of Interferon Response CGAMP Interactor 1 | 17.99 |
| KLRK1 | Killer Cell Lectin Like Receptor K1 | 17.98 |
| CD27 | CD27 Molecule | 17.97 |
| BCL2 | BCL2 Apoptosis Regulator | 17.95 |
| APOBEC3F | Apolipoprotein B MRNA Editing Enzyme Catalytic Subunit 3F | 17.9 |
| CTLA4 | Cytotoxic T-Lymphocyte Associated Protein 4 | 17.82 |
| MIR17 | MicroRNA 17 | 17.8 |
| CD274 | CD274 Molecule | 17.8 |
| BCL2L1 | BCL2 Like 1 | 17.79 |
| RIPK1 | Receptor Interacting Serine/Threonine Kinase 1 | 17.77 |
| CDK1 | Cyclin Dependent Kinase 1 | 17.74 |
| MPL | MPL Proto-Oncogene, Thrombopoietin Receptor | 17.73 |
| DCLRE1C | DNA Cross-Link Repair 1C | 17.7 |
| SP1 | Sp1 Transcription Factor | 17.62 |
| RFXANK | Regulatory Factor X Associated Ankyrin Containing Protein | 17.61 |
| RFX5 | Regulatory Factor X5 | 17.61 |
| RFXAP | Regulatory Factor X Associated Protein | 17.61 |
| SHFL | Shiftless Antiviral Inhibitor Of Ribosomal Frameshifting | 17.6 |
| CLEC5A | C-Type Lectin Domain Containing 5A | 17.57 |
| UNC13D | Unc-13 Homolog D | 17.56 |
| PNP | Purine Nucleoside Phosphorylase | 17.56 |
| NHEJ1 | Non-Homologous End Joining Factor 1 | 17.55 |
| HLA-DPB1 | Major Histocompatibility Complex, Class II, DP Beta 1 | 17.5 |
| MBL2 | Mannose Binding Lectin 2 | 17.47 |
| IFNL4 | Interferon Lambda 4 (Gene/Pseudogene) | 17.45 |
| AXL | AXL Receptor Tyrosine Kinase | 17.35 |
| TKT | Transketolase | 17.33 |
| ERVK-6 | Endogenous Retrovirus Group K Member 6, Envelope | 17.31 |
| ACADS | Acyl-CoA Dehydrogenase Short Chain | 17.31 |
| CD80 | CD80 Molecule | 17.29 |
| CREBBP | CREB Binding Protein | 17.23 |
| TNFRSF1A | TNF Receptor Superfamily Member 1A | 17.23 |
| IL15 | Interleukin 15 | 17.22 |
| CD40 | CD40 Molecule | 17.21 |
| IL2RB | Interleukin 2 Receptor Subunit Beta | 17.16 |
| LTA | Lymphotoxin Alpha | 17.11 |
| FMR1 | FMRP Translational Regulator 1 | 17.09 |
| CXCR1 | C-X-C Motif Chemokine Receptor 1 | 17.04 |
| MSN | Moesin | 17.03 |
| TYRO3 | TYRO3 Protein Tyrosine Kinase | 17.01 |
| STXBP2 | Syntaxin Binding Protein 2 | 17 |
| TGFB1 | Transforming Growth Factor Beta 1 | 16.98 |
| BANF1 | BAF Nuclear Assembly Factor 1 | 16.93 |
| ITGAV | Integrin Subunit Alpha V | 16.91 |
| FLVCR2 | FLVCR Heme Transporter 2 | 16.73 |
| DHX58 | DExH-Box Helicase 58 | 16.73 |
| PPIA | Peptidylprolyl Isomerase A | 16.73 |
| REL | REL Proto-Oncogene, NF-KB Subunit | 16.57 |
| STX11 | Syntaxin 11 | 16.53 |
| HSP90AA1 | Heat Shock Protein 90 Alpha Family Class A Member 1 | 16.5 |
| IL7 | Interleukin 7 | 16.49 |
| IFI16 | Interferon Gamma Inducible Protein 16 | 16.47 |
| TAT | Tyrosine Aminotransferase | 16.43 |
| GYPC | Glycophorin C (Gerbich Blood Group) | 16.43 |
| PRNT | Prion Locus LncRNA, Testis Expressed | 16.4 |
| AKT2 | AKT Serine/Threonine Kinase 2 | 16.39 |
| CGAS | Cyclic GMP-AMP Synthase | 16.38 |
| CDKN1A | Cyclin Dependent Kinase Inhibitor 1A | 16.36 |
| CCNT1 | Cyclin T1 | 16.33 |
| ITGAL | Integrin Subunit Alpha L | 16.33 |
| KRT18 | Keratin 18 | 16.33 |
| BRAF | B-Raf Proto-Oncogene, Serine/Threonine Kinase | 16.29 |
| TNFRSF1B | TNF Receptor Superfamily Member 1B | 16.26 |
| GZMB | Granzyme B | 16.13 |
| SLC22A5 | Solute Carrier Family 22 Member 5 | 16.13 |
| IKBKE | Inhibitor Of Nuclear Factor Kappa B Kinase Subunit Epsilon | 16.1 |
| MET | MET Proto-Oncogene, Receptor Tyrosine Kinase | 16.1 |
| LDLR | Low Density Lipoprotein Receptor | 16.09 |
| TNFRSF4 | TNF Receptor Superfamily Member 4 | 16.07 |
| IL1A | Interleukin 1 Alpha | 16.02 |
| CREB3 | CAMP Responsive Element Binding Protein 3 | 15.94 |
| BAX | BCL2 Associated X, Apoptosis Regulator | 15.94 |
| PVR | PVR Cell Adhesion Molecule | 15.93 |
| AKT3 | AKT Serine/Threonine Kinase 3 | 15.89 |
| IFIT1 | Interferon Induced Protein With Tetratricopeptide Repeats 1 | 15.86 |
| VEGFA | Vascular Endothelial Growth Factor A | 15.84 |
| HLA-DQA1 | Major Histocompatibility Complex, Class II, DQ Alpha 1 | 15.82 |
| ISG20 | Interferon Stimulated Exonuclease Gene 20 | 15.79 |
| CCR5AS | CCR5 Antisense RNA | 15.78 |
| MIR145 | MicroRNA 145 | 15.74 |
| CTPS1 | CTP Synthase 1 | 15.71 |
| MOV10 | Mov10 RISC Complex RNA Helicase | 15.69 |
| HIVEP2 | HIVEP Zinc Finger 2 | 15.66 |
| SKP2 | S-Phase Kinase Associated Protein 2 | 15.63 |
| CRK | CRK Proto-Oncogene, Adaptor Protein | 15.61 |
| TSG101 | Tumor Susceptibility 101 | 15.57 |
| ICOSLG | Inducible T Cell Costimulator Ligand | 15.55 |
| CCR3 | C-C Motif Chemokine Receptor 3 | 15.51 |
| LCK | LCK Proto-Oncogene, Src Family Tyrosine Kinase | 15.51 |
| LIG4 | DNA Ligase 4 | 15.5 |
| EP300 | E1A Binding Protein P300 | 15.47 |
| CCR2 | C-C Motif Chemokine Receptor 2 | 15.4 |
| XPO1 | Exportin 1 | 15.38 |
| TAP2 | Transporter 2, ATP Binding Cassette Subfamily B Member | 15.38 |
| PSMA7 | Proteasome 20S Subunit Alpha 7 | 15.38 |
| PGM3 | Phosphoglucomutase 3 | 15.37 |
| MRC1 | Mannose Receptor C-Type 1 | 15.24 |
| RB1 | RB Transcriptional Corepressor 1 | 15.23 |
| CASP1 | Caspase 1 | 15.22 |
| NFE2L2 | Nuclear Factor, Erythroid 2 Like 2 | 15.21 |
| AXIN1 | Axin 1 | 15.21 |
| FOXP3 | Forkhead Box P3 | 15.16 |
| IKBKG | Inhibitor Of Nuclear Factor Kappa B Kinase Regulatory Subunit Gamma | 15.15 |
| CD28 | CD28 Molecule | 15.1 |
| MIR146A | MicroRNA 146a | 15.04 |
| FLVCR1 | FLVCR Heme Transporter 1 | 15.03 |
| GGT1 | Gamma-Glutamyltransferase 1 | 15 |
| CASP9 | Caspase 9 | 14.98 |
| SPI1 | Spi-1 Proto-Oncogene | 14.94 |
| SP100 | SP100 Nuclear Antigen | 14.85 |
| MAPK3 | Mitogen-Activated Protein Kinase 3 | 14.84 |
| CCR1 | C-C Motif Chemokine Receptor 1 | 14.82 |
| EVI5 | Ecotropic Viral Integration Site 5 | 14.82 |
| RPSA | Ribosomal Protein SA | 14.8 |
| CD55 | CD55 Molecule (Cromer Blood Group) | 14.79 |
| TLR8 | Toll Like Receptor 8 | 14.67 |
| CXCR3 | C-X-C Motif Chemokine Receptor 3 | 14.6 |
| EIF4G1 | Eukaryotic Translation Initiation Factor 4 Gamma 1 | 14.56 |
| IL12B | Interleukin 12B | 14.52 |
| EGF | Epidermal Growth Factor | 14.49 |
| F2 | Coagulation Factor II, Thrombin | 14.47 |
| HIVEP3 | HIVEP Zinc Finger 3 | 14.42 |
| UBE3A | Ubiquitin Protein Ligase E3A | 14.41 |
| TNFSF10 | TNF Superfamily Member 10 | 14.38 |
| CD9 | CD9 Molecule | 14.36 |
| CDK9 | Cyclin Dependent Kinase 9 | 14.34 |
| SOCS3 | Suppressor Of Cytokine Signaling 3 | 14.32 |
| CDK2 | Cyclin Dependent Kinase 2 | 14.3 |
| IL5 | Interleukin 5 | 14.3 |
| SENP8 | SUMO Peptidase Family Member, NEDD8 Specific | 14.29 |
| NCAM1 | Neural Cell Adhesion Molecule 1 | 14.29 |
| CLDN6 | Claudin 6 | 14.29 |
| IL13 | Interleukin 13 | 14.28 |
| ACE2 | Angiotensin I Converting Enzyme 2 | 14.28 |
| FLG | Filaggrin | 14.26 |
| DAXX | Death Domain Associated Protein | 14.26 |
| APOBEC3H | Apolipoprotein B MRNA Editing Enzyme Catalytic Subunit 3H | 14.24 |
| SLC17A5 | Solute Carrier Family 17 Member 5 | 14.24 |
| MIR143 | MicroRNA 143 | 14.23 |
| IL10RB | Interleukin 10 Receptor Subunit Beta | 14.23 |
| HSPA1A | Heat Shock Protein Family A (Hsp70) Member 1A | 14.22 |
| G6PD | Glucose-6-Phosphate Dehydrogenase | 14.22 |
| MCM4 | Minichromosome Maintenance Complex Component 4 | 14.12 |
| APOBEC3B | Apolipoprotein B MRNA Editing Enzyme Catalytic Subunit 3B | 14.09 |
| NBN | Nibrin | 14.08 |
| CR1 | Complement C3b/C4b Receptor 1 (Knops Blood Group) | 14.06 |
| HLA-DRA | Major Histocompatibility Complex, Class II, DR Alpha | 14.05 |
| USP7 | Ubiquitin Specific Peptidase 7 | 14.02 |
| ERBB3 | Erb-B2 Receptor Tyrosine Kinase 3 | 14.01 |
| IDO1 | Indoleamine 2,3-Dioxygenase 1 | 13.9 |
| MIR20A | MicroRNA 20a | 13.9 |
| F3 | Coagulation Factor III, Tissue Factor | 13.89 |
| CDKN3 | Cyclin Dependent Kinase Inhibitor 3 | 13.86 |
| TFRC | Transferrin Receptor | 13.84 |
| IL17A | Interleukin 17A | 13.8 |
| SSB | Small RNA Binding Exonuclease Protection Factor La | 13.74 |
| CD247 | CD247 Molecule | 13.72 |
| STAU1 | Staufen Double-Stranded RNA Binding Protein 1 | 13.67 |
| MIR31 | MicroRNA 31 | 13.67 |
| ETS2 | ETS Proto-Oncogene 2, Transcription Factor | 13.66 |
| MMP9 | Matrix Metallopeptidase 9 | 13.63 |
| H2AC18 | H2A Clustered Histone 18 | 13.6 |
| TRIM22 | Tripartite Motif Containing 22 | 13.59 |
| LGALS9 | Galectin 9 | 13.57 |
| NFKB2 | Nuclear Factor Kappa B Subunit 2 | 13.53 |
| CDH1 | Cadherin 1 | 13.49 |
| DPP4 | Dipeptidyl Peptidase 4 | 13.48 |
| ELANE | Elastase, Neutrophil Expressed | 13.45 |
| CLDN9 | Claudin 9 | 13.43 |
| HADHB | Hydroxyacyl-CoA Dehydrogenase Trifunctional Multienzyme Complex Subunit Beta | 13.42 |
| MIRLET7C | MicroRNA Let-7c | 13.37 |
| JAK2 | Janus Kinase 2 | 13.34 |
| CD70 | CD70 Molecule | 13.24 |
| CDK4 | Cyclin Dependent Kinase 4 | 13.22 |
| LAMP1 | Lysosomal Associated Membrane Protein 1 | 13.2 |
| CD86 | CD86 Molecule | 13.19 |
| ACKR1 | Atypical Chemokine Receptor 1 (Duffy Blood Group) | 13.17 |
| GRB2 | Growth Factor Receptor Bound Protein 2 | 13.16 |
| GLI2 | GLI Family Zinc Finger 2 | 13.15 |
| EPHA2 | EPH Receptor A2 | 13.13 |
| FGFR1 | Fibroblast Growth Factor Receptor 1 | 13.12 |
| ATG5 | Autophagy Related 5 | 13.11 |
| MOG | Myelin Oligodendrocyte Glycoprotein | 13.08 |
| CD3G | CD3g Molecule | 13.08 |
| KPNA4 | Karyopherin Subunit Alpha 4 | 13.01 |
| KPNA2 | Karyopherin Subunit Alpha 2 | 13 |
| IFNL1 | Interferon Lambda 1 | 12.95 |
| TMPRSS2 | Transmembrane Serine Protease 2 | 12.94 |
| POLG | DNA Polymerase Gamma, Catalytic Subunit | 12.94 |
| MIF | Macrophage Migration Inhibitory Factor | 12.92 |
| MYCN | MYCN Proto-Oncogene, BHLH Transcription Factor | 12.92 |
| TBC1D20 | TBC1 Domain Family Member 20 | 12.91 |
| CYCS | Cytochrome C, Somatic | 12.86 |
| POU2F1 | POU Class 2 Homeobox 1 | 12.82 |
| ANKLE2 | Ankyrin Repeat And LEM Domain Containing 2 | 12.81 |
| STK4 | Serine/Threonine Kinase 4 | 12.81 |
| CRTC3 | CREB Regulated Transcription Coactivator 3 | 12.8 |
| SCARA3 | Scavenger Receptor Class A Member 3 | 12.79 |
| HM13 | Histocompatibility Minor 13 | 12.75 |
| RARB | Retinoic Acid Receptor Beta | 12.69 |
| MAP3K7 | Mitogen-Activated Protein Kinase Kinase Kinase 7 | 12.68 |
| DOCK2 | Dedicator Of Cytokinesis 2 | 12.67 |
| INS | Insulin | 12.66 |
| NEFL | Neurofilament Light | 12.65 |
| FCGR2A | Fc Fragment Of IgG Receptor IIa | 12.65 |
| FGFR3 | Fibroblast Growth Factor Receptor 3 | 12.63 |
| MDM2 | MDM2 Proto-Oncogene | 12.63 |
| MIR93 | MicroRNA 93 | 12.62 |
| ERBB4 | Erb-B2 Receptor Tyrosine Kinase 4 | 12.61 |
| HIVEP1 | HIVEP Zinc Finger 1 | 12.59 |
| S100B | S100 Calcium Binding Protein B | 12.58 |
| NSMCE3 | NSE3 Homolog, SMC5-SMC6 Complex Component | 12.58 |
| VCAM1 | Vascular Cell Adhesion Molecule 1 | 12.55 |
| FAU | FAU Ubiquitin Like And Ribosomal Protein S30 Fusion | 12.53 |
| CRTC1 | CREB Regulated Transcription Coactivator 1 | 12.52 |
| TCF4 | Transcription Factor 4 | 12.52 |
| MYB | MYB Proto-Oncogene, Transcription Factor | 12.5 |
| KPNA1 | Karyopherin Subunit Alpha 1 | 12.47 |
| MIR29A | MicroRNA 29a | 12.47 |
| IFNA21 | Interferon Alpha 21 | 12.45 |
| PLCG1 | Phospholipase C Gamma 1 | 12.45 |
| PIK3C2A | Phosphatidylinositol-4-Phosphate 3-Kinase Catalytic Subunit Type 2 Alpha | 12.44 |
| MIR223 | MicroRNA 223 | 12.44 |
| MIR127 | MicroRNA 127 | 12.44 |
| MIR34A | MicroRNA 34a | 12.38 |
| APOBEC3A | Apolipoprotein B MRNA Editing Enzyme Catalytic Subunit 3A | 12.34 |
| CXCL1 | C-X-C Motif Chemokine Ligand 1 | 12.34 |
| G3BP1 | G3BP Stress Granule Assembly Factor 1 | 12.29 |
| SOD1 | Superoxide Dismutase 1 | 12.29 |
| SLC10A1 | Solute Carrier Family 10 Member 1 | 12.28 |
| XRCC5 | X-Ray Repair Cross Complementing 5 | 12.25 |
| BAK1 | BCL2 Antagonist/Killer 1 | 12.23 |
| TERC | Telomerase RNA Component | 12.22 |
| GOLM1 | Golgi Membrane Protein 1 | 12.22 |
| RTRAF | RNA Transcription, Translation And Transport Factor | 12.2 |
| KPNA3 | Karyopherin Subunit Alpha 3 | 12.19 |
| GPS2 | G Protein Pathway Suppressor 2 | 12.18 |
| MTUS1 | Microtubule Associated Scaffold Protein 1 | 12.17 |
| ZC3HAV1L | Zinc Finger CCCH-Type Containing, Antiviral 1 Like | 12.16 |
| GNAS | GNAS Complex Locus | 12.15 |
| CDK6 | Cyclin Dependent Kinase 6 | 12.14 |
| E2F1 | E2F Transcription Factor 1 | 12.11 |
| TREX1 | Three Prime Repair Exonuclease 1 | 12.07 |
| CCL3L1 | C-C Motif Chemokine Ligand 3 Like 1 | 12.06 |
| FYN | FYN Proto-Oncogene, Src Family Tyrosine Kinase | 12.04 |
| AFP | Alpha Fetoprotein | 12.02 |
| SLAMF6 | SLAM Family Member 6 | 12.01 |
| MIR200B | MicroRNA 200b | 12.01 |
| NEAT1 | Nuclear Paraspeckle Assembly Transcript 1 | 12 |
| HERC5 | HECT And RLD Domain Containing E3 Ubiquitin Protein Ligase 5 | 11.97 |
| IFNA4 | Interferon Alpha 4 | 11.96 |
| CSF3 | Colony Stimulating Factor 3 | 11.95 |
| CCR8 | C-C Motif Chemokine Receptor 8 | 11.94 |
| C1QBP | Complement C1q Binding Protein | 11.93 |
| C3 | Complement C3 | 11.93 |
| DUSP3 | Dual Specificity Phosphatase 3 | 11.92 |
| ADARB1 | Adenosine Deaminase RNA Specific B1 | 11.91 |
| IFNA17 | Interferon Alpha 17 | 11.91 |
| LINC01194 | Long Intergenic Non-Protein Coding RNA 1194 | 11.87 |
| KPNB1 | Karyopherin Subunit Beta 1 | 11.87 |
| PTGS2 | Prostaglandin-Endoperoxide Synthase 2 | 11.82 |
| HIF1A | Hypoxia Inducible Factor 1 Subunit Alpha | 11.81 |
| PARP1 | Poly(ADP-Ribose) Polymerase 1 | 11.78 |
| ICAM3 | Intercellular Adhesion Molecule 3 | 11.77 |
| TBP | TATA-Box Binding Protein | 11.76 |
| CCNT2 | Cyclin T2 | 11.75 |
| IL16 | Interleukin 16 | 11.74 |
| APOBEC3C | Apolipoprotein B MRNA Editing Enzyme Catalytic Subunit 3C | 11.74 |
| EFNB2 | Ephrin B2 | 11.73 |
| IFI6 | Interferon Alpha Inducible Protein 6 | 11.73 |
| SYK | Spleen Associated Tyrosine Kinase | 11.71 |
| G3BP2 | G3BP Stress Granule Assembly Factor 2 | 11.69 |
| PILRA | Paired Immunoglobin Like Type 2 Receptor Alpha | 11.69 |
| ITGB1 | Integrin Subunit Beta 1 | 11.68 |
| MIR195 | MicroRNA 195 | 11.67 |
| TRIM25 | Tripartite Motif Containing 25 | 11.67 |
| EXOC1 | Exocyst Complex Component 1 | 11.66 |
| CD44 | CD44 Molecule (Indian Blood Group) | 11.65 |
| ATR | ATR Serine/Threonine Kinase | 11.65 |
| MIR106B | MicroRNA 106b | 11.63 |
| XRCC6 | X-Ray Repair Cross Complementing 6 | 11.61 |
| CHD6 | Chromodomain Helicase DNA Binding Protein 6 | 11.61 |
| MCCC1 | Methylcrotonoyl-CoA Carboxylase 1 | 11.61 |
| RASGRP1 | RAS Guanyl Releasing Protein 1 | 11.59 |
| HLA-DMA | Major Histocompatibility Complex, Class II, DM Alpha | 11.58 |
| NR3C1 | Nuclear Receptor Subfamily 3 Group C Member 1 | 11.57 |
| MIR224 | MicroRNA 224 | 11.56 |
| IGF2R | Insulin Like Growth Factor 2 Receptor | 11.56 |
| PDCD6IP | Programmed Cell Death 6 Interacting Protein | 11.55 |
| HLA-DPA1 | Major Histocompatibility Complex, Class II, DP Alpha 1 | 11.55 |
| NUP98 | Nucleoporin 98 And 96 Precursor | 11.55 |
| CCND2 | Cyclin D2 | 11.48 |
| MIR19A | MicroRNA 19a | 11.48 |
| SMAD3 | SMAD Family Member 3 | 11.47 |
| EIF2AK4 | Eukaryotic Translation Initiation Factor 2 Alpha Kinase 4 | 11.47 |
| OAS2 | 2'-5'-Oligoadenylate Synthetase 2 | 11.47 |
| DDX17 | DEAD-Box Helicase 17 | 11.46 |
| BECN1 | Beclin 1 | 11.38 |
| CD69 | CD69 Molecule | 11.37 |
| ANXA5 | Annexin A5 | 11.37 |
| MICB | MHC Class I Polypeptide-Related Sequence B | 11.36 |
| NECTIN4 | Nectin Cell Adhesion Molecule 4 | 11.33 |
| SPCS3 | Signal Peptidase Complex Subunit 3 | 11.31 |
| MAPK14 | Mitogen-Activated Protein Kinase 14 | 11.3 |
| SKI | SKI Proto-Oncogene | 11.3 |
| BTK | Bruton Tyrosine Kinase | 11.3 |
| GPR15 | G Protein-Coupled Receptor 15 | 11.29 |
| PAK2 | P21 (RAC1) Activated Kinase 2 | 11.27 |
| MIR181B1 | MicroRNA 181b-1 | 11.23 |
| NEDD4 | NEDD4 E3 Ubiquitin Protein Ligase | 11.23 |
| LY6E | Lymphocyte Antigen 6 Family Member E | 11.22 |
| CRTC2 | CREB Regulated Transcription Coactivator 2 | 11.21 |
| GP2 | Glycoprotein 2 | 11.21 |
| NMT2 | N-Myristoyltransferase 2 | 11.2 |
| RUNX3 | RUNX Family Transcription Factor 3 | 11.19 |
| RRP1B | Ribosomal RNA Processing 1B | 11.16 |
| CRKL | CRK Like Proto-Oncogene, Adaptor Protein | 11.14 |
| CCNA2 | Cyclin A2 | 11.14 |
| ABL2 | ABL Proto-Oncogene 2, Non-Receptor Tyrosine Kinase | 11.13 |
| FGR | FGR Proto-Oncogene, Src Family Tyrosine Kinase | 11.11 |
| KDR | Kinase Insert Domain Receptor | 11.09 |
| TSC1 | TSC Complex Subunit 1 | 11.09 |
| KPNA5 | Karyopherin Subunit Alpha 5 | 11.09 |
| CD79A | CD79a Molecule | 11.06 |
| DEPDC5 | DEP Domain Containing 5, GATOR1 Subcomplex Subunit | 11.05 |
| YY1 | YY1 Transcription Factor | 11.04 |
| ZNF17 | Zinc Finger Protein 17 | 11.04 |
| CDKN1B | Cyclin Dependent Kinase Inhibitor 1B | 10.99 |
| HCP5 | HLA Complex P5 | 10.97 |
| IFNA8 | Interferon Alpha 8 | 10.97 |
| CCNB1 | Cyclin B1 | 10.94 |
| DDB1 | Damage Specific DNA Binding Protein 1 | 10.94 |
| YES1 | YES Proto-Oncogene 1, Src Family Tyrosine Kinase | 10.94 |
| AIP | Aryl Hydrocarbon Receptor Interacting Protein | 10.91 |
| SERPINA3 | Serpin Family A Member 3 | 10.89 |
| RMRP | RNA Component Of Mitochondrial RNA Processing Endoribonuclease | 10.89 |
| MIR214 | MicroRNA 214 | 10.88 |
| MIR23B | MicroRNA 23b | 10.87 |
| VIM | Vimentin | 10.87 |
| ZDHHC2 | Zinc Finger DHHC-Type Palmitoyltransferase 2 | 10.86 |
| HSPA5 | Heat Shock Protein Family A (Hsp70) Member 5 | 10.83 |
| MPP1 | Membrane Palmitoylated Protein 1 | 10.82 |
| CXCL9 | C-X-C Motif Chemokine Ligand 9 | 10.81 |
| DPYD | Dihydropyrimidine Dehydrogenase | 10.81 |
| CYP3A4 | Cytochrome P450 Family 3 Subfamily A Member 4 | 10.77 |
| EFNB3 | Ephrin B3 | 10.77 |
| BAD | BCL2 Associated Agonist Of Cell Death | 10.74 |
| SLC20A2 | Solute Carrier Family 20 Member 2 | 10.74 |
| SMARCB1 | SWI/SNF Related, Matrix Associated, Actin Dependent Regulator Of Chromatin, Subfamily B, Member 1 | 10.74 |
| MBP | Myelin Basic Protein | 10.73 |
| MIR221 | MicroRNA 221 | 10.72 |
| SH2D3C | SH2 Domain Containing 3C | 10.69 |
| ARCN1 | Archain 1 | 10.68 |
| CALCA | Calcitonin Related Polypeptide Alpha | 10.68 |
| TSC2 | TSC Complex Subunit 2 | 10.66 |
| DHFR | Dihydrofolate Reductase | 10.65 |
| PABPC1 | Poly(A) Binding Protein Cytoplasmic 1 | 10.62 |
| XBP1 | X-Box Binding Protein 1 | 10.62 |
| GAS6 | Growth Arrest Specific 6 | 10.62 |
| HMOX1 | Heme Oxygenase 1 | 10.61 |
| NXF1 | Nuclear RNA Export Factor 1 | 10.6 |
| MYBL1 | MYB Proto-Oncogene Like 1 | 10.59 |
| EPO | Erythropoietin | 10.58 |
| ERG | ETS Transcription Factor ERG | 10.57 |
| DCK | Deoxycytidine Kinase | 10.54 |
| TGFBR1 | Transforming Growth Factor Beta Receptor 1 | 10.54 |
| FGA | Fibrinogen Alpha Chain | 10.54 |
| FCGR1A | Fc Fragment Of IgG Receptor Ia | 10.51 |
| PSIP1 | PC4 And SFRS1 Interacting Protein 1 | 10.47 |
| PIK3R2 | Phosphoinositide-3-Kinase Regulatory Subunit 2 | 10.46 |
| MIR16-1 | MicroRNA 16-1 | 10.45 |
| MIR29C | MicroRNA 29c | 10.45 |
| PPP2R1A | Protein Phosphatase 2 Scaffold Subunit Aalpha | 10.43 |
| GBP1 | Guanylate Binding Protein 1 | 10.42 |
| EIF5A | Eukaryotic Translation Initiation Factor 5A | 10.41 |
| DNMT1 | DNA Methyltransferase 1 | 10.41 |
| NLRX1 | NLR Family Member X1 | 10.37 |
| GAPDH | Glyceraldehyde-3-Phosphate Dehydrogenase | 10.34 |
| TNFSF13B | TNF Superfamily Member 13b | 10.33 |
| TMPO | Thymopoietin | 10.32 |
| KHDRBS1 | KH RNA Binding Domain Containing, Signal Transduction Associated 1 | 10.29 |
| RAC1 | Rac Family Small GTPase 1 | 10.29 |
| FLI1 | Fli-1 Proto-Oncogene, ETS Transcription Factor | 10.24 |
| GYPA | Glycophorin A (MNS Blood Group) | 10.23 |
| IL1RN | Interleukin 1 Receptor Antagonist | 10.23 |
| IK | IK Cytokine | 10.22 |
| NOS2 | Nitric Oxide Synthase 2 | 10.21 |
| ILF3 | Interleukin Enhancer Binding Factor 3 | 10.2 |
| IL19 | Interleukin 19 | 10.18 |
| SMU1 | SMU1 DNA Replication Regulator And Spliceosomal Factor | 10.18 |
| FBXW11 | F-Box And WD Repeat Domain Containing 11 | 10.17 |
| IRF4 | Interferon Regulatory Factor 4 | 10.16 |
| MCL1 | MCL1 Apoptosis Regulator, BCL2 Family Member | 10.16 |
| BIRC3 | Baculoviral IAP Repeat Containing 3 | 10.15 |
| MXRA8 | Matrix Remodeling Associated 8 | 10.15 |
| CUL1 | Cullin 1 | 10.15 |
| MYCL | MYCL Proto-Oncogene, BHLH Transcription Factor | 10.15 |
| NR5A2 | Nuclear Receptor Subfamily 5 Group A Member 2 | 10.14 |
| SEPSECS | Sep (O-Phosphoserine) TRNA:Sec (Selenocysteine) TRNA Synthase | 10.14 |
| SFTPD | Surfactant Protein D | 10.13 |
| HCFC2 | Host Cell Factor C2 | 10.12 |
| CPD | Carboxypeptidase D | 10.11 |
| HSPA4 | Heat Shock Protein Family A (Hsp70) Member 4 | 10.07 |
| MAP2K1 | Mitogen-Activated Protein Kinase Kinase 1 | 10.06 |
| DGUOK | Deoxyguanosine Kinase | 10.06 |
| ACTB | Actin Beta | 10.04 |
| HNRNPK | Heterogeneous Nuclear Ribonucleoprotein K | 10.03 |
| HCK | HCK Proto-Oncogene, Src Family Tyrosine Kinase | 10.02 |
| PRDM1 | PR/SET Domain 1 | 10.02 |
| KAT5 | Lysine Acetyltransferase 5 | 10 |
| DNAJC3 | DnaJ Heat Shock Protein Family (Hsp40) Member C3 | 10 |
| PIK3CB | Phosphatidylinositol-4,5-Bisphosphate 3-Kinase Catalytic Subunit Beta | 9.96 |
| TRPV1 | Transient Receptor Potential Cation Channel Subfamily V Member 1 | 9.96 |
| TLR1 | Toll Like Receptor 1 | 9.94 |
| SRP54 | Signal Recognition Particle 54 | 9.94 |
| DNAAF2 | Dynein Axonemal Assembly Factor 2 | 9.93 |
| ATRX | ATRX Chromatin Remodeler | 9.93 |
| RALA | RAS Like Proto-Oncogene A | 9.93 |
| GRIN2B | Glutamate Ionotropic Receptor NMDA Type Subunit 2B | 9.92 |
| EZR | Ezrin | 9.91 |
| NME1 | NME/NM23 Nucleoside Diphosphate Kinase 1 | 9.91 |
| IL12A | Interleukin 12A | 9.89 |
| MVB12A | Multivesicular Body Subunit 12A | 9.89 |
| BTRC | Beta-Transducin Repeat Containing E3 Ubiquitin Protein Ligase | 9.89 |
| IRF5 | Interferon Regulatory Factor 5 | 9.88 |
| TBX21 | T-Box Transcription Factor 21 | 9.88 |
| POLR2A | RNA Polymerase II Subunit A | 9.88 |
| BIRC5 | Baculoviral IAP Repeat Containing 5 | 9.87 |
| IL11 | Interleukin 11 | 9.87 |
| ZDHHC19 | Zinc Finger DHHC-Type Palmitoyltransferase 19 | 9.86 |
| TNFSF14 | TNF Superfamily Member 14 | 9.85 |
| NOTCH1 | Notch Receptor 1 | 9.84 |
| EIF2B3 | Eukaryotic Translation Initiation Factor 2B Subunit Gamma | 9.83 |
| CPSF4 | Cleavage And Polyadenylation Specific Factor 4 | 9.83 |
| CTDP1 | CTD Phosphatase Subunit 1 | 9.81 |
| TP73 | Tumor Protein P73 | 9.8 |
| F8 | Coagulation Factor VIII | 9.8 |
| FGF2 | Fibroblast Growth Factor 2 | 9.76 |
| RPL18A | Ribosomal Protein L18a | 9.76 |
| MFN2 | Mitofusin 2 | 9.75 |
| CHEK1 | Checkpoint Kinase 1 | 9.75 |
| MOS | MOS Proto-Oncogene, Serine/Threonine Kinase | 9.75 |
| GTF2B | General Transcription Factor IIB | 9.74 |
| MYBL2 | MYB Proto-Oncogene Like 2 | 9.73 |
| CD160 | CD160 Molecule | 9.73 |
| BCL6 | BCL6 Transcription Repressor | 9.72 |
| KRT19 | Keratin 19 | 9.71 |
| PPP1CA | Protein Phosphatase 1 Catalytic Subunit Alpha | 9.69 |
| MAPK10 | Mitogen-Activated Protein Kinase 10 | 9.68 |
| PDGFRL | Platelet Derived Growth Factor Receptor Like | 9.67 |
| MUC1 | Mucin 1, Cell Surface Associated | 9.67 |
| KARS1 | Lysyl-TRNA Synthetase 1 | 9.66 |
| IRAK4 | Interleukin 1 Receptor Associated Kinase 4 | 9.66 |
| ELOC | Elongin C | 9.65 |
| CCND3 | Cyclin D3 | 9.65 |
| ITGA5 | Integrin Subunit Alpha 5 | 9.63 |
| MBTPS1 | Membrane Bound Transcription Factor Peptidase, Site 1 | 9.63 |
| VIPR1 | Vasoactive Intestinal Peptide Receptor 1 | 9.62 |
| GSTM1 | Glutathione S-Transferase Mu 1 | 9.62 |
| PSMB9 | Proteasome 20S Subunit Beta 9 | 9.62 |
| OASL | 2'-5'-Oligoadenylate Synthetase Like | 9.61 |
| TANK | TRAF Family Member Associated NFKB Activator | 9.59 |
| CEACAM5 | CEA Cell Adhesion Molecule 5 | 9.58 |
| MALT1 | MALT1 Paracaspase | 9.58 |
| SP110 | SP110 Nuclear Body Protein | 9.57 |
| HS3ST3B1 | Heparan Sulfate-Glucosamine 3-Sulfotransferase 3B1 | 9.56 |
| RAN | RAN, Member RAS Oncogene Family | 9.55 |
| DHX30 | DExH-Box Helicase 30 | 9.55 |
| RELB | RELB Proto-Oncogene, NF-KB Subunit | 9.55 |
| DLG1 | Discs Large MAGUK Scaffold Protein 1 | 9.54 |
| CUL5 | Cullin 5 | 9.54 |
| CD19 | CD19 Molecule | 9.52 |
| SMAD2 | SMAD Family Member 2 | 9.52 |
| LTF | Lactotransferrin | 9.51 |
| STAT5A | Signal Transducer And Activator Of Transcription 5A | 9.5 |
| IL1R1 | Interleukin 1 Receptor Type 1 | 9.49 |
| MMP2 | Matrix Metallopeptidase 2 | 9.49 |
| PI4KA | Phosphatidylinositol 4-Kinase Alpha | 9.48 |
| ACADL | Acyl-CoA Dehydrogenase Long Chain | 9.48 |
| FOXN1 | Forkhead Box N1 | 9.48 |
| TNFRSF8 | TNF Receptor Superfamily Member 8 | 9.47 |
| MECP2 | Methyl-CpG Binding Protein 2 | 9.46 |
| HGF | Hepatocyte Growth Factor | 9.45 |
| RALB | RAS Like Proto-Oncogene B | 9.44 |
| IL12RB1 | Interleukin 12 Receptor Subunit Beta 1 | 9.43 |
| SPART | Spartin | 9.42 |
| BPHL | Biphenyl Hydrolase Like | 9.42 |
| MIR181A1 | MicroRNA 181a-1 | 9.42 |
| NUP214 | Nucleoporin 214 | 9.42 |
| PHB | Prohibitin | 9.41 |
| CCDC130 | Coiled-Coil Domain Containing 130 | 9.41 |
| RPS27A | Ribosomal Protein S27a | 9.41 |
| IFNA6 | Interferon Alpha 6 | 9.4 |
| IFNGR1 | Interferon Gamma Receptor 1 | 9.4 |
| DCAF1 | DDB1 And CUL4 Associated Factor 1 | 9.4 |
| DDX1 | DEAD-Box Helicase 1 | 9.38 |
| DYRK1A | Dual Specificity Tyrosine Phosphorylation Regulated Kinase 1A | 9.35 |
| MMP7 | Matrix Metallopeptidase 7 | 9.34 |
| PQBP1 | Polyglutamine Binding Protein 1 | 9.34 |
| ALYREF | Aly/REF Export Factor | 9.34 |
| POU5F1 | POU Class 5 Homeobox 1 | 9.34 |
| NGLY1 | N-Glycanase 1 | 9.31 |
| MIR222 | MicroRNA 222 | 9.31 |
| IDH1 | Isocitrate Dehydrogenase (NADP(+)) 1 | 9.3 |
| COL17A1 | Collagen Type XVII Alpha 1 Chain | 9.29 |
| IRAK1 | Interleukin 1 Receptor Associated Kinase 1 | 9.29 |
| PNKD | PNKD Metallo-Beta-Lactamase Domain Containing | 9.28 |
| PPARG | Peroxisome Proliferator Activated Receptor Gamma | 9.28 |
| PRKDC | Protein Kinase, DNA-Activated, Catalytic Subunit | 9.27 |
| TNFRSF10B | TNF Receptor Superfamily Member 10b | 9.27 |
| SON | SON DNA And RNA Binding Protein | 9.25 |
| BIRC2 | Baculoviral IAP Repeat Containing 2 | 9.24 |
| CALM1 | Calmodulin 1 | 9.24 |
| DDIT4L | DNA Damage Inducible Transcript 4 Like | 9.22 |
| MIR18A | MicroRNA 18a | 9.22 |
| CFH | Complement Factor H | 9.21 |
| ESR1 | Estrogen Receptor 1 | 9.21 |
| CD38 | CD38 Molecule | 9.2 |
| CAV1 | Caveolin 1 | 9.19 |
| CAMK2B | Calcium/Calmodulin Dependent Protein Kinase II Beta | 9.19 |
| SLPI | Secretory Leukocyte Peptidase Inhibitor | 9.19 |
| HDAC1 | Histone Deacetylase 1 | 9.18 |
| SMC1A | Structural Maintenance Of Chromosomes 1A | 9.15 |
| CFLAR | CASP8 And FADD Like Apoptosis Regulator | 9.15 |
| BCL2L11 | BCL2 Like 11 | 9.14 |
| RASSF1 | Ras Association Domain Family Member 1 | 9.14 |
| PAK3 | P21 (RAC1) Activated Kinase 3 | 9.13 |
| SBDS | SBDS Ribosome Maturation Factor | 9.13 |
| RNU4ATAC | RNA, U4atac Small Nuclear (U12-Dependent Splicing) | 9.13 |
| CCDC85B | Coiled-Coil Domain Containing 85B | 9.12 |
| CDKN2B | Cyclin Dependent Kinase Inhibitor 2B | 9.12 |
| TNFRSF10A | TNF Receptor Superfamily Member 10a | 9.12 |
| PTK2 | Protein Tyrosine Kinase 2 | 9.11 |
| CADM1 | Cell Adhesion Molecule 1 | 9.11 |
| ACTG1 | Actin Gamma 1 | 9.1 |
| MIR27A | MicroRNA 27a | 9.1 |
| SIRT1 | Sirtuin 1 | 9.1 |
| CYP2D6 | Cytochrome P450 Family 2 Subfamily D Member 6 | 9.09 |
| BID | BH3 Interacting Domain Death Agonist | 9.09 |
| TAX1BP1 | Tax1 Binding Protein 1 | 9.08 |
| IDH2 | Isocitrate Dehydrogenase (NADP(+)) 2 | 9.08 |
| PTMA | Prothymosin Alpha | 9.07 |
| GDNF | Glial Cell Derived Neurotrophic Factor | 9.06 |
| PCLAF | PCNA Clamp Associated Factor | 9.06 |
| CDH5 | Cadherin 5 | 9.05 |
| PNPLA3 | Patatin Like Phospholipase Domain Containing 3 | 9.05 |
| EPS15 | Epidermal Growth Factor Receptor Pathway Substrate 15 | 9.04 |
| TLR6 | Toll Like Receptor 6 | 9.03 |
| GTPBP1 | GTP Binding Protein 1 | 9.01 |
| MIR203A | MicroRNA 203a | 9.01 |
| MEIS1 | Meis Homeobox 1 | 9 |
| VRK1 | VRK Serine/Threonine Kinase 1 | 8.98 |
| ARAF | A-Raf Proto-Oncogene, Serine/Threonine Kinase | 8.98 |
| PIM2 | Pim-2 Proto-Oncogene, Serine/Threonine Kinase | 8.97 |
| CANX | Calnexin | 8.96 |
| MIR34B | MicroRNA 34b | 8.95 |
| FBXL2 | F-Box And Leucine Rich Repeat Protein 2 | 8.95 |
| TRIM52 | Tripartite Motif Containing 52 | 8.95 |
| WWOX | WW Domain Containing Oxidoreductase | 8.95 |
| GINS1 | GINS Complex Subunit 1 | 8.95 |
| CORO1A | Coronin 1A | 8.94 |
| POU2F2 | POU Class 2 Homeobox 2 | 8.91 |
| CCR4 | C-C Motif Chemokine Receptor 4 | 8.91 |
| CHD7 | Chromodomain Helicase DNA Binding Protein 7 | 8.91 |
| TAF8 | TATA-Box Binding Protein Associated Factor 8 | 8.9 |
| CAT | Catalase | 8.89 |
| FGL2 | Fibrinogen Like 2 | 8.89 |
| ITGB2 | Integrin Subunit Beta 2 | 8.88 |
| DDX60L | DExD/H-Box 60 Like | 8.87 |
| GZMA | Granzyme A | 8.86 |
| CD82 | CD82 Molecule | 8.84 |
| THBD | Thrombomodulin | 8.83 |
| CYP1A1 | Cytochrome P450 Family 1 Subfamily A Member 1 | 8.82 |
| NPM1 | Nucleophosmin 1 | 8.82 |
| TUBB4A | Tubulin Beta 4A Class IVa | 8.81 |
| HLA-DQA2 | Major Histocompatibility Complex, Class II, DQ Alpha 2 | 8.81 |
| PI4KB | Phosphatidylinositol 4-Kinase Beta | 8.81 |
| TRAF1 | TNF Receptor Associated Factor 1 | 8.81 |
| ELOB | Elongin B | 8.81 |
| AP4M1 | Adaptor Related Protein Complex 4 Subunit Mu 1 | 8.8 |
| IGF1 | Insulin Like Growth Factor 1 | 8.78 |
| UBD | Ubiquitin D | 8.76 |
| CSNK2A1 | Casein Kinase 2 Alpha 1 | 8.75 |
| EZH2 | Enhancer Of Zeste 2 Polycomb Repressive Complex 2 Subunit | 8.74 |
| YTHDF2 | YTH N6-Methyladenosine RNA Binding Protein 2 | 8.74 |
| JUND | JunD Proto-Oncogene, AP-1 Transcription Factor Subunit | 8.73 |
| CYB5R3 | Cytochrome B5 Reductase 3 | 8.7 |
| HSPB1 | Heat Shock Protein Family B (Small) Member 1 | 8.69 |
| AICDA | Activation Induced Cytidine Deaminase | 8.69 |
| CFP | Complement Factor Properdin | 8.69 |
| SERPINB3 | Serpin Family B Member 3 | 8.69 |
| ANPEP | Alanyl Aminopeptidase, Membrane | 8.68 |
| FOSL1 | FOS Like 1, AP-1 Transcription Factor Subunit | 8.68 |
| NRBP1 | Nuclear Receptor Binding Protein 1 | 8.68 |
| SOCS1 | Suppressor Of Cytokine Signaling 1 | 8.67 |
| RHOA | Ras Homolog Family Member A | 8.67 |
| LYST | Lysosomal Trafficking Regulator | 8.67 |
| PLA2G6 | Phospholipase A2 Group VI | 8.66 |
| NIPBL | NIPBL Cohesin Loading Factor | 8.65 |
| PRKCA | Protein Kinase C Alpha | 8.65 |
| CPT1A | Carnitine Palmitoyltransferase 1A | 8.65 |
| HMGCL | 3-Hydroxy-3-Methylglutaryl-CoA Lyase | 8.65 |
| IRF8 | Interferon Regulatory Factor 8 | 8.64 |
| PATL1 | PAT1 Homolog 1, Processing Body MRNA Decay Factor | 8.64 |
| HARS1 | Histidyl-TRNA Synthetase 1 | 8.64 |
| SPP1 | Secreted Phosphoprotein 1 | 8.62 |
| MFSD2A | Major Facilitator Superfamily Domain Containing 2A | 8.62 |
| TRIM63 | Tripartite Motif Containing 63 | 8.61 |
| ASGR1 | Asialoglycoprotein Receptor 1 | 8.6 |
| AP3B1 | Adaptor Related Protein Complex 3 Subunit Beta 1 | 8.59 |
| SLC25A6 | Solute Carrier Family 25 Member 6 | 8.59 |
| MIR22 | MicroRNA 22 | 8.59 |
| NLRP3 | NLR Family Pyrin Domain Containing 3 | 8.59 |
| TWIST1 | Twist Family BHLH Transcription Factor 1 | 8.58 |
| UNC119 | Unc-119 Lipid Binding Chaperone | 8.56 |
| EVI5L | Ecotropic Viral Integration Site 5 Like | 8.56 |
| CCL7 | C-C Motif Chemokine Ligand 7 | 8.55 |
| FCER2 | Fc Fragment Of IgE Receptor II | 8.55 |
| ZEB1 | Zinc Finger E-Box Binding Homeobox 1 | 8.55 |
| BRCA1 | BRCA1 DNA Repair Associated | 8.55 |
| PC | Pyruvate Carboxylase | 8.55 |
| IFNL2 | Interferon Lambda 2 | 8.54 |
| CLEC12A | C-Type Lectin Domain Family 12 Member A | 8.54 |
| TCIRG1 | T Cell Immune Regulator 1, ATPase H+ Transporting V0 Subunit A3 | 8.54 |
| EPG5 | Ectopic P-Granules Autophagy Protein 5 Homolog | 8.54 |
| BRD4 | Bromodomain Containing 4 | 8.53 |
| HELLS | Helicase, Lymphoid Specific | 8.51 |
| HVBS8 | Hepatitis B Virus Integration Site 8 | 8.51 |
| STT3B | STT3 Oligosaccharyltransferase Complex Catalytic Subunit B | 8.51 |
| FOSB | FosB Proto-Oncogene, AP-1 Transcription Factor Subunit | 8.51 |
| CLEC1B | C-Type Lectin Domain Family 1 Member B | 8.5 |
| TAX1BP3 | Tax1 Binding Protein 3 | 8.48 |
| TXN | Thioredoxin | 8.48 |
| GSTP1 | Glutathione S-Transferase Pi 1 | 8.48 |
| RNF168 | Ring Finger Protein 168 | 8.48 |
| PLXNC1 | Plexin C1 | 8.48 |
| HDAC8 | Histone Deacetylase 8 | 8.47 |
| ASGR2 | Asialoglycoprotein Receptor 2 | 8.47 |
| PRKRA | Protein Activator Of Interferon Induced Protein Kinase EIF2AK2 | 8.47 |
| IFT81 | Intraflagellar Transport 81 | 8.46 |
| NUP62 | Nucleoporin 62 | 8.46 |
| CXCR2 | C-X-C Motif Chemokine Receptor 2 | 8.45 |
| NDST1 | N-Deacetylase And N-Sulfotransferase 1 | 8.45 |
| CD207 | CD207 Molecule | 8.45 |
| SCRIB | Scribble Planar Cell Polarity Protein | 8.45 |
| IL6ST | Interleukin 6 Signal Transducer | 8.45 |
| CYP2B6 | Cytochrome P450 Family 2 Subfamily B Member 6 | 8.44 |
| MIR196A2 | MicroRNA 196a-2 | 8.43 |
| TCERG1 | Transcription Elongation Regulator 1 | 8.43 |
| ETFDH | Electron Transfer Flavoprotein Dehydrogenase | 8.43 |
| TJP1 | Tight Junction Protein 1 | 8.42 |
| ITGB6 | Integrin Subunit Beta 6 | 8.41 |
| ITGA4 | Integrin Subunit Alpha 4 | 8.41 |
| DHX8 | DEAH-Box Helicase 8 | 8.41 |
| HLA-DRB5 | Major Histocompatibility Complex, Class II, DR Beta 5 | 8.4 |
| TRIM21 | Tripartite Motif Containing 21 | 8.4 |
| NUP153 | Nucleoporin 153 | 8.4 |
| IL3 | Interleukin 3 | 8.39 |
| IL6R | Interleukin 6 Receptor | 8.39 |
| CD244 | CD244 Molecule | 8.39 |
| ALK | ALK Receptor Tyrosine Kinase | 8.39 |
| IGHMBP2 | Immunoglobulin Mu DNA Binding Protein 2 | 8.38 |
| CXCL11 | C-X-C Motif Chemokine Ligand 11 | 8.38 |
| RPL22 | Ribosomal Protein L22 | 8.38 |
| CPQ | Carboxypeptidase Q | 8.37 |
| HYAL2 | Hyaluronidase 2 | 8.37 |
| GRM7 | Glutamate Metabotropic Receptor 7 | 8.37 |
| EVI2A | Ecotropic Viral Integration Site 2A | 8.37 |
| GFI1 | Growth Factor Independent 1 Transcriptional Repressor | 8.36 |
| PLA2G12B | Phospholipase A2 Group XIIB | 8.35 |
| EGR1 | Early Growth Response 1 | 8.35 |
| TRPM7 | Transient Receptor Potential Cation Channel Subfamily M Member 7 | 8.35 |
| BATF | Basic Leucine Zipper ATF-Like Transcription Factor | 8.34 |
| STXBP1 | Syntaxin Binding Protein 1 | 8.34 |
| PTK2B | Protein Tyrosine Kinase 2 Beta | 8.34 |
| CD2AP | CD2 Associated Protein | 8.34 |
| CCL17 | C-C Motif Chemokine Ligand 17 | 8.33 |
| IRF2 | Interferon Regulatory Factor 2 | 8.33 |
| MPO | Myeloperoxidase | 8.33 |
| MIR125A | MicroRNA 125a | 8.32 |
| EXOSC3 | Exosome Component 3 | 8.32 |
| CCL22 | C-C Motif Chemokine Ligand 22 | 8.32 |
| NR1H3 | Nuclear Receptor Subfamily 1 Group H Member 3 | 8.3 |
| ATG12 | Autophagy Related 12 | 8.3 |
| ERVK-9 | Endogenous Retrovirus Group K Member 9 | 8.3 |
| RILPL2 | Rab Interacting Lysosomal Protein Like 2 | 8.29 |
| RPS6KB1 | Ribosomal Protein S6 Kinase B1 | 8.29 |
| SIN3A | SIN3 Transcription Regulator Family Member A | 8.29 |
| CDK5RAP2 | CDK5 Regulatory Subunit Associated Protein 2 | 8.28 |
| VDAC1 | Voltage Dependent Anion Channel 1 | 8.28 |
| MIR181A2 | MicroRNA 181a-2 | 8.28 |
| CARD11 | Caspase Recruitment Domain Family Member 11 | 8.28 |
| HNRNPA1 | Heterogeneous Nuclear Ribonucleoprotein A1 | 8.27 |
| RPL6 | Ribosomal Protein L6 | 8.27 |
| NUP42 | Nucleoporin 42 | 8.26 |
| VRK2 | VRK Serine/Threonine Kinase 2 | 8.25 |
| CLEC4A | C-Type Lectin Domain Family 4 Member A | 8.24 |
| GTF2H1 | General Transcription Factor IIH Subunit 1 | 8.24 |
| GEMIN4 | Gem Nuclear Organelle Associated Protein 4 | 8.24 |
| HSPD1 | Heat Shock Protein Family D (Hsp60) Member 1 | 8.24 |
| LARP1 | La Ribonucleoprotein 1, Translational Regulator | 8.23 |
| CSF1 | Colony Stimulating Factor 1 | 8.23 |
| BISPR | BST2 Interferon Stimulated Positive Regulator | 8.23 |
| TIMP2 | TIMP Metallopeptidase Inhibitor 2 | 8.23 |
| RAB27A | RAB27A, Member RAS Oncogene Family | 8.22 |
| CD52 | CD52 Molecule | 8.22 |
| TOLLIP | Toll Interacting Protein | 8.21 |
| MIR24-2 | MicroRNA 24-2 | 8.21 |
| SELE | Selectin E | 8.2 |
| CCNE1 | Cyclin E1 | 8.2 |
| HTR2A | 5-Hydroxytryptamine Receptor 2A | 8.2 |
| GBF1 | Golgi Brefeldin A Resistant Guanine Nucleotide Exchange Factor 1 | 8.19 |
| PIK3CG | Phosphatidylinositol-4,5-Bisphosphate 3-Kinase Catalytic Subunit Gamma | 8.19 |
| TARBP2 | TARBP2 Subunit Of RISC Loading Complex | 8.19 |
| CD34 | CD34 Molecule | 8.17 |
| TLR10 | Toll Like Receptor 10 | 8.17 |
| PRODH | Proline Dehydrogenase 1 | 8.16 |
| KCNH3 | Potassium Voltage-Gated Channel Subfamily H Member 3 | 8.15 |
| WASHC2C | WASH Complex Subunit 2C | 8.15 |
| SULT1A3 | Sulfotransferase Family 1A Member 3 | 8.15 |
| ALOX5 | Arachidonate 5-Lipoxygenase | 8.14 |
| CSF1R | Colony Stimulating Factor 1 Receptor | 8.13 |
| NCR1 | Natural Cytotoxicity Triggering Receptor 1 | 8.12 |
| CD163 | CD163 Molecule | 8.11 |
| DNMT3B | DNA Methyltransferase 3 Beta | 8.1 |
| RTN3 | Reticulon 3 | 8.1 |
| POLR2E | RNA Polymerase II, I And III Subunit E | 8.1 |
| HVBS7 | Hepatitis B Virus Integration Site 7 | 8.1 |
| MMP3 | Matrix Metallopeptidase 3 | 8.1 |
| POLR2I | RNA Polymerase II Subunit I | 8.1 |
| PCBP2 | Poly(RC) Binding Protein 2 | 8.1 |
| MAD2L1 | Mitotic Arrest Deficient 2 Like 1 | 8.09 |
| MTHFR | Methylenetetrahydrofolate Reductase | 8.07 |
| EVI2B | Ecotropic Viral Integration Site 2B | 8.07 |
| CXCR5 | C-X-C Motif Chemokine Receptor 5 | 8.05 |
| HOTAIR | HOX Transcript Antisense RNA | 8.05 |
| CARMIL2 | Capping Protein Regulator And Myosin 1 Linker 2 | 8.05 |
| TRPM6 | Transient Receptor Potential Cation Channel Subfamily M Member 6 | 8.04 |
| SH2D3A | SH2 Domain Containing 3A | 8.04 |
| CDC42 | Cell Division Cycle 42 | 8.04 |
| LINC01191 | Long Intergenic Non-Protein Coding RNA 1191 | 8.04 |
| COL7A1 | Collagen Type VII Alpha 1 Chain | 8.04 |
| POLR2L | RNA Polymerase II, I And III Subunit L | 8.03 |
| SCARB2 | Scavenger Receptor Class B Member 2 | 8.03 |
| TM9SF2 | Transmembrane 9 Superfamily Member 2 | 8.02 |
| CMTR1 | Cap Methyltransferase 1 | 8.02 |
| TGFB2 | Transforming Growth Factor Beta 2 | 8.02 |
| ARF1 | ADP Ribosylation Factor 1 | 8.02 |
| MIR30E | MicroRNA 30e | 8.02 |
| DIABLO | Diablo IAP-Binding Mitochondrial Protein | 8.02 |
| MT-CYB | Mitochondrially Encoded Cytochrome B | 8.02 |
| CC2D2A | Coiled-Coil And C2 Domain Containing 2A | 8.01 |
| MYH7 | Myosin Heavy Chain 7 | 8.01 |
| ABL1 | ABL Proto-Oncogene 1, Non-Receptor Tyrosine Kinase | 8 |
| PSMD2 | Proteasome 26S Subunit, Non-ATPase 2 | 8 |
| ERCC2 | ERCC Excision Repair 2, TFIIH Core Complex Helicase Subunit | 7.99 |
| PRKCE | Protein Kinase C Epsilon | 7.99 |
| RNASEH2A | Ribonuclease H2 Subunit A | 7.99 |
| NUP205 | Nucleoporin 205 | 7.99 |
| LMBRD1 | LMBR1 Domain Containing 1 | 7.98 |
| MIR9-1 | MicroRNA 9-1 | 7.98 |
| NR4A1 | Nuclear Receptor Subfamily 4 Group A Member 1 | 7.98 |
| MKI67 | Marker Of Proliferation Ki-67 | 7.97 |
| IFNE | Interferon Epsilon | 7.97 |
| URI1 | URI1 Prefoldin Like Chaperone | 7.97 |
| FGFR2 | Fibroblast Growth Factor Receptor 2 | 7.97 |
| TH | Tyrosine Hydroxylase | 7.97 |
| HLA-F | Major Histocompatibility Complex, Class I, F | 7.97 |
| ASPM | Assembly Factor For Spindle Microtubules | 7.96 |
| PTBP1 | Polypyrimidine Tract Binding Protein 1 | 7.96 |
| FOXA2 | Forkhead Box A2 | 7.96 |
| HP | Haptoglobin | 7.96 |
| MRE11 | MRE11 Homolog, Double Strand Break Repair Nuclease | 7.95 |
| CD14 | CD14 Molecule | 7.95 |
| JAG1 | Jagged Canonical Notch Ligand 1 | 7.94 |
| ABCE1 | ATP Binding Cassette Subfamily E Member 1 | 7.94 |
| ATP2B3 | ATPase Plasma Membrane Ca2+ Transporting 3 | 7.93 |
| KCNJ10 | Potassium Inwardly Rectifying Channel Subfamily J Member 10 | 7.93 |
| VPS13B | Vacuolar Protein Sorting 13 Homolog B | 7.93 |
| TSEN54 | TRNA Splicing Endonuclease Subunit 54 | 7.93 |
| SVBP | Small Vasohibin Binding Protein | 7.93 |
| SOX2 | SRY-Box Transcription Factor 2 | 7.93 |
| FAM111A | Family With Sequence Similarity 111 Member A | 7.93 |
| CHKA | Choline Kinase Alpha | 7.93 |
| DYNLL1 | Dynein Light Chain LC8-Type 1 | 7.92 |
| RACK1 | Receptor For Activated C Kinase 1 | 7.92 |
| DIAPH1 | Diaphanous Related Formin 1 | 7.91 |
| PRKCB | Protein Kinase C Beta | 7.91 |
| MIR181C | MicroRNA 181c | 7.91 |
| ANKRD17 | Ankyrin Repeat Domain 17 | 7.91 |
| VEGFC | Vascular Endothelial Growth Factor C | 7.9 |
| NCL | Nucleolin | 7.89 |
| MIR142 | MicroRNA 142 | 7.89 |
| HLA-DOA | Major Histocompatibility Complex, Class II, DO Alpha | 7.88 |
| APAF1 | Apoptotic Peptidase Activating Factor 1 | 7.88 |
| DDX39B | DExD-Box Helicase 39B | 7.88 |
| IGHE | Immunoglobulin Heavy Constant Epsilon | 7.88 |
| E2F2 | E2F Transcription Factor 2 | 7.87 |
| FHL2 | Four And A Half LIM Domains 2 | 7.87 |
| TLR5 | Toll Like Receptor 5 | 7.87 |
| CP | Ceruloplasmin | 7.87 |
| RXRA | Retinoid X Receptor Alpha | 7.85 |

Supplementary table 5. PPI analysis for the major hubs related to the herbal anti-inflammatory effect.

| Gene Symbol | Degree | Betweeness | Clossness |
| --- | --- | --- | --- |
| TNF | 50 | 0.1809997 | 0.795181 |
| AKT1 | 43 | 0.06888599 | 0.725275 |
| PTGS2 | 37 | 0.05856375 | 0.680412 |
| SRC | 37 | 0.05356697 | 0.694737 |
| IL2 | 33 | 0.04478825 | 0.647059 |
| ESR1 | 23 | 0.04467903 | 0.589286 |
| EGFR | 35 | 0.03629143 | 0.673469 |
| CCL5 | 23 | 0.03532099 | 0.584071 |
| CASP3 | 35 | 0.02896328 | 0.666667 |
| PPARG | 26 | 0.02775375 | 0.594595 |
| NOS3 | 24 | 0.025147 | 0.589286 |
| NR3C1 | 19 | 0.02460306 | 0.564103 |
| MAPK8 | 33 | 0.0241383 | 0.647059 |
| IFNG | 23 | 0.0189302 | 0.6 |
| ACE | 20 | 0.01797144 | 0.564103 |
| HRAS | 28 | 0.01708545 | 0.611111 |
| F2 | 17 | 0.01606331 | 0.55 |

Supplementary table 6. PPI analysis for the major hubs related to the herbal anti-viral effect.

| Gene Symbol | Degree | Betweeness | Clossness |
| --- | --- | --- | --- |
| IL2 | 33 | 0.08732118 | 0.726027 |
| TNF | 40 | 0.08657648 | 0.80303 |
| AKT1 | 44 | 0.0739499 | 0.854839 |
| SRC | 39 | 0.05077714 | 0.791045 |
| CASP9 | 26 | 0.04479698 | 0.654321 |
| CASP3 | 38 | 0.03189254 | 0.768116 |
| HRAS | 35 | 0.03053746 | 0.746479 |
| MAPK8 | 34 | 0.0299617 | 0.736111 |
| EGFR | 34 | 0.02420732 | 0.726027 |
| PTGS2 | 30 | 0.02326075 | 0.697368 |
| ESR1 | 30 | 0.02252918 | 0.679487 |
| HDAC1 | 27 | 0.02242825 | 0.654321 |
| RELA | 31 | 0.02239486 | 0.697368 |
| MAPK14 | 30 | 0.0206915 | 0.688312 |
| IFNG | 21 | 0.01579265 | 0.616279 |
| NR3C1 | 19 | 0.01425109 | 0.602273 |
